# Supplementary material for: A Predictive machine-learning model for propagation rate coefficients in radical polymerization
Source: Royal Society of Chemistry journal article supplement (doi:10.1039/d2py01531e), 2023-01-01
Supplement: d2py01531e1.pdf [file d2py01531e1.pdf]

# A Predictive Machine-Learning Model for Kinetic Rate Coefficients in Radical Polymerization

Emma Van de Reydt,<sup>a</sup> Noam Marom,<sup>b</sup> James Saunderson,<sup>b</sup> Mario Boley<sup>c</sup> and Tanja Junkers<sup>a,\*</sup>

- 
- <sup>a.</sup> *Polymer Reaction Design Group, School of Chemistry, Monash University 19 Rainforest Walk, Building 23, Clayton, Vic 3800 (Australia) E-mail: tanja.junkers@monash.edu.*
- <sup>b.</sup> *Electrical and Computer Systems Engineering, Monash University, 14 Alliance Lane, Building 72, Clayton, Vic 3800 (Australia).*
- <sup>c.</sup> *Faculty for Information Technology, Monash University, 20 Exhibition Walk, Clayton, Vic 3800 (Australia)*

## Training data overview

Table S1: Alphabetic list of monomers considered with their abbreviation and SMILES notation.

| Monomer name                             | Abbreviation | SMILES                                                   |
|------------------------------------------|--------------|----------------------------------------------------------|
| 1,3-Butadiene                            | <b>BuDE</b>  | <chem>C=CC=C</chem>                                      |
| 2-(Hexylcarbamoyloxy)ethyl acrylate      | <b>HCEA</b>  | <chem>C=CC(OCCOC(NCCCCCC)=O)=O</chem>                    |
| 2-(Hexylcarbamoyloxy)isopropyl acrylate  | <b>HCPA</b>  | <chem>C=C(OC(NCCCCCC)=O)C(OC(C)C)=O</chem>               |
| 2-(Phenylcarbamoyloxy)ethyl acrylate     | <b>PhCEA</b> | <chem>C=CC(OCCOC(NC1=CC=CC=C1)=O)=O</chem>               |
| 2-(Phenylcarbamoyloxy)isopropyl acrylate | <b>PhCPA</b> | <chem>C=C(OC(NC1=CC=CC=C1)=O)C(OC(C)C)=O</chem>          |
| 2-ethylhexyl acrylate                    | <b>EHA</b>   | <chem>C=CC(OC[C@H](CC)CCCC)=O</chem>                     |
| 2-ethylhexyl methacrylate                | <b>EHMA</b>  | <chem>CC(C(OC[C@H](CC)CCCC)=O)=C</chem>                  |
| 2-hydroxypropyl methacrylate             | <b>HPMA</b>  | <chem>CC(C(OC[C@H](O)C)=O)=C</chem>                      |
| 2-propylheptyl acrylate                  | <b>PHA</b>   | <chem>C=CC(OC[C@H](CCC)CCCCC)=O</chem>                   |
| Acrylonitrile                            | <b>CAN</b>   | <chem>C=CC#N</chem>                                      |
| Behenyl acrylate                         | <b>BeA</b>   | <chem>C=CC(OCCCCCCCCCCCCCCCCCCCCC)=O</chem>              |
| Behenyl methacrylate                     | <b>BeMA</b>  | <chem>CC(C(OCCCCCCCCCCCCCCCCCCCCC)=O)=C</chem>           |
| Benzyl acrylate                          | <b>BnA</b>   | <chem>C=CC(OCC1=CC=CC=C1)=O</chem>                       |
| Benzyl methacrylate                      | <b>BzMA</b>  | <chem>CC(C(OCC1=CC=CC=C1)=O)=C</chem>                    |
| Butyl methacrylate                       | <b>BMA</b>   | <chem>CC(C(OCCCC)=O)=C</chem>                            |
| Cyclohexyl methacrylate                  | <b>CHMA</b>  | <chem>CC(C(OC1CCCCC1)=O)=C</chem>                        |
| Dodecyl methacrylate                     | <b>DMA</b>   | <chem>CC(C(OCCCCCCCCCCCCC)=O)=C</chem>                   |
| Ethoxyethyl acrylate                     | <b>EEA</b>   | <chem>C=CC(OCCOCC)=O</chem>                              |
| Ethyl methacrylate                       | <b>EMA</b>   | <chem>CC(C(OCC)=O)=C</chem>                              |
| Glycidyl methacrylate                    | <b>GMA</b>   | <chem>CC(C(OC[C@@H]1CO1)=O)=C</chem>                     |
| Henicosyl acrylate                       | <b>C21A</b>  | <chem>C=CC(OCCCCCCCCCCCCCCCCCCC)=O</chem>                |
| Heptadecyl acrylate                      | <b>C17A</b>  | <chem>C=CC(OCCCCCCCCCCCCCCCCC)=O</chem>                  |
| Hydroxyethyl methacrylate                | <b>HEMA</b>  | <chem>CC(C(OCCO)=O)=C</chem>                             |
| Isobornyl acrylate                       | <b>iBoa</b>  | <chem>C=CC(O[C@H]1C[C@@H]2CC[C@@]1(C)C2(C)C)=O</chem>    |
| iso-bornyl methacrylate                  | <b>iBoMA</b> | <chem>CC(C(O[C@H]1C[C@@H]2CC[C@@]1(C)C2(C)C)=O)=C</chem> |
| iso-butyl methacrylate                   | <b>iBMA</b>  | <chem>CC(C(OCC(C)C)=O)=C</chem>                          |
| iso-decyl methacrylate                   | <b>iDeMA</b> | <chem>CC(C(OCCCCCCC(C)C)=O)=C</chem>                     |
| iso-nonyl acrylate                       | <b>INA-A</b> | <chem>C=CC(OCCCCCCC(C)C)=O</chem>                        |
| Methacrylic acid                         | <b>MAA</b>   | <chem>CC(C(O)=O)=C</chem>                                |
| Methyl acrylate                          | <b>MA</b>    | <chem>C=CC(OC)=O</chem>                                  |
| Methyl methacrylate                      | <b>MMA</b>   | <chem>CC(C(OC)=O)=C</chem>                               |
| n-Butyl acrylate                         | <b>BA</b>    | <chem>C=CC(OCCCC)=O</chem>                               |
| n-Pentyl Methacrylate                    | <b>PnMA</b>  | <chem>CC(C(OCCCCC)=O)=C</chem>                           |
| N-vinyl formamide                        | <b>NVF</b>   | <chem>O=CNC=C</chem>                                     |
| N-Vinyl Pyrrolidone                      | <b>NVP</b>   | <chem>O=C1N(C=C)CCC1</chem>                              |
| Propylheptyl methacrylate                | <b>PHMA</b>  | <chem>CC(C(O[C@@H](CCC)CCCCC)=O)=C</chem>                |
| Stearyl acrylate                         | <b>SA</b>    | <chem>C=CC(OCCCCCCCCCCCCCCCCC)=O</chem>                  |
| Stearyl methacrylate                     | <b>SMA</b>   | <chem>CC(C(OCCCCCCCCCCCCCCCCC)=O)=C</chem>               |
| Styrene                                  | <b>Sty</b>   | <chem>C=CC1=CC=CC=C1</chem>                              |
| tert-butyl acrylate                      | <b>tBA</b>   | <chem>C=CC(OC(C)(C)C)=O</chem>                           |
| Vinyl acetate                            | <b>VAc</b>   | <chem>CC(OC=C)=O</chem>                                  |

Table S2: List of monomers classified by type (acrylates, H-bonding monomers, methacrylates and other) with the activation energy  $E_a$  and pre-exponential factor  $A$ . Using the Arrhenius equation, the natural logarithm of the rate constant  $\ln(k_p)$  was calculated for four different temperatures.

|                    | Monomer | $E_a / \text{J}\cdot\text{mol}^{-1}$ | $A / \text{s}^{-1}$ | $\ln(k_p / \text{L}\cdot\text{mol}^{-1}\cdot\text{s}^{-1})$<br>$T = 25^\circ\text{C}$ | $\ln(k_p / \text{L}\cdot\text{mol}^{-1}\cdot\text{s}^{-1})$<br>$T = 50^\circ\text{C}$ | $\ln(k_p / \text{L}\cdot\text{mol}^{-1}\cdot\text{s}^{-1})$<br>$T = 75^\circ\text{C}$ | $\ln(k_p / \text{L}\cdot\text{mol}^{-1}\cdot\text{s}^{-1})$<br>$T = 100^\circ\text{C}$ | Source |
|--------------------|---------|--------------------------------------|---------------------|---------------------------------------------------------------------------------------|---------------------------------------------------------------------------------------|---------------------------------------------------------------------------------------|----------------------------------------------------------------------------------------|--------|
| Acrylates          | BA      | 17.90                                | 22100000            | 9.69                                                                                  | 10.25                                                                                 | 10.73                                                                                 | 11.14                                                                                  | [1, 2] |
|                    | BeA     | 13.02                                | 5350000             | 10.24                                                                                 | 10.65                                                                                 | 10.99                                                                                 | 11.30                                                                                  | [2]    |
|                    | BnA     | 16.12                                | 12800000            | 9.86                                                                                  | 10.36                                                                                 | 10.80                                                                                 | 11.17                                                                                  | [3]    |
|                    | C17A    | 14.66                                | 8150000             | 10.00                                                                                 | 10.46                                                                                 | 10.85                                                                                 | 11.19                                                                                  | [2]    |
|                    | C21A    | 12.99                                | 3220000             | 9.74                                                                                  | 10.15                                                                                 | 10.50                                                                                 | 10.80                                                                                  | [2]    |
|                    | EEA     | 13.80                                | 6300000             | 10.09                                                                                 | 10.52                                                                                 | 10.89                                                                                 | 11.21                                                                                  | [2]    |
|                    | EHA     | 15.80                                | 9100000             | 9.65                                                                                  | 10.14                                                                                 | 10.57                                                                                 | 10.93                                                                                  | [2]    |
|                    | iBoA    | 15.35                                | 4810000             | 9.19                                                                                  | 9.67                                                                                  | 10.08                                                                                 | 10.44                                                                                  | [3]    |
|                    | INA-A   | 16.54                                | 13500000            | 9.75                                                                                  | 10.26                                                                                 | 10.70                                                                                 | 11.09                                                                                  | [2]    |
|                    | MA      | 17.30                                | 14100000            | 9.48                                                                                  | 10.02                                                                                 | 10.48                                                                                 | 10.89                                                                                  | [4]    |
|                    | PHA     | 16.41                                | 10500000            | 9.55                                                                                  | 10.06                                                                                 | 10.50                                                                                 | 10.88                                                                                  | [2]    |
|                    | SA      | 16.93                                | 18600000            | 9.91                                                                                  | 10.44                                                                                 | 10.89                                                                                 | 11.28                                                                                  | [2]    |
|                    | tBA     | 18.90                                | 22100000            | 9.69                                                                                  | 10.25                                                                                 | 10.73                                                                                 | 11.14                                                                                  | [5]    |
| H-Bonding monomers | HCEA    | 13.30                                | 6600000             | 10.34                                                                                 | 10.75                                                                                 | 11.11                                                                                 | 11.42                                                                                  | [6]    |
|                    | HCPA    | 14.10                                | 6600000             | 10.01                                                                                 | 10.45                                                                                 | 10.83                                                                                 | 11.16                                                                                  | [6]    |
|                    | HEMA    | 21.90                                | 8880000             | 7.16                                                                                  | 7.85                                                                                  | 8.43                                                                                  | 8.94                                                                                   | [7]    |
|                    | HPMA    | 20.80                                | 3510000             | 6.68                                                                                  | 7.33                                                                                  | 7.88                                                                                  | 8.37                                                                                   | [7]    |
|                    | PhCEA   | 14.30                                | 12000000            | 10.53                                                                                 | 10.98                                                                                 | 11.36                                                                                 | 11.69                                                                                  | [6]    |
|                    | PhCPA   | 14.20                                | 4900000             | 9.68                                                                                  | 10.12                                                                                 | 10.50                                                                                 | 10.83                                                                                  | [6]    |
| Methacrylates      | BeMA    | 20.52                                | 2510000             | 6.46                                                                                  | 7.10                                                                                  | 7.65                                                                                  | 8.12                                                                                   | [8]    |
|                    | BMA     | 22.90                                | 3801894             | 5.91                                                                                  | 6.63                                                                                  | 7.24                                                                                  | 7.77                                                                                   | [9]    |
|                    | BzMA    | 22.90                                | 6760830             | 6.49                                                                                  | 7.20                                                                                  | 7.82                                                                                  | 8.35                                                                                   | [10]   |
|                    | CHMA    | 23.00                                | 6309573             | 6.38                                                                                  | 7.10                                                                                  | 7.71                                                                                  | 8.24                                                                                   | [10]   |
|                    | DMA     | 21.00                                | 2511886             | 6.27                                                                                  | 6.92                                                                                  | 7.48                                                                                  | 7.97                                                                                   | [9]    |
|                    | EHMA    | 21.60                                | 2390000             | 5.97                                                                                  | 6.65                                                                                  | 7.22                                                                                  | 7.72                                                                                   | [7]    |
|                    | EMA     | 23.40                                | 4073803             | 5.78                                                                                  | 6.51                                                                                  | 7.14                                                                                  | 7.68                                                                                   | [9]    |
|                    | GMA     | 22.90                                | 5011872             | 6.19                                                                                  | 6.90                                                                                  | 7.52                                                                                  | 8.05                                                                                   | [10]   |
|                    | iBMA    | 21.80                                | 2640000             | 5.99                                                                                  | 6.67                                                                                  | 7.25                                                                                  | 7.76                                                                                   | [7]    |
|                    | iBoMA   | 23.10                                | 6165950             | 6.32                                                                                  | 7.04                                                                                  | 7.65                                                                                  | 8.19                                                                                   | [10]   |
|                    | iDeMA   | 21.60                                | 2390000             | 5.97                                                                                  | 6.65                                                                                  | 7.22                                                                                  | 7.72                                                                                   | [7]    |
|                    | MMA     | 22.36                                | 2673006             | 5.78                                                                                  | 6.48                                                                                  | 7.07                                                                                  | 7.59                                                                                   | [11]   |
|                    | PHMA    | 21.72                                | 2830000             | 6.09                                                                                  | 6.77                                                                                  | 7.35                                                                                  | 7.85                                                                                   | [8]    |
|                    | PnMA    | 23.80                                | 6000000             | 6.01                                                                                  | 6.75                                                                                  | 7.38                                                                                  | 7.94                                                                                   | [12]   |
|                    | SMA     | 21.49                                | 3450000             | 6.39                                                                                  | 7.06                                                                                  | 7.63                                                                                  | 8.13                                                                                   | [8]    |
| Other              | BuDE    | 35.70                                | 80500000            | 3.81                                                                                  | 4.91                                                                                  | 5.87                                                                                  | 6.70                                                                                   | [7]    |
|                    | CAN     | 15.40                                | 1790000             | 8.19                                                                                  | 8.67                                                                                  | 9.08                                                                                  | 9.43                                                                                   | [13]   |
|                    | MAA     | 16.10                                | 380000              | 6.35                                                                                  | 6.86                                                                                  | 7.29                                                                                  | 7.66                                                                                   | [7]    |
|                    | NVF     | 19.50                                | 6400000             | 7.81                                                                                  | 8.41                                                                                  | 8.93                                                                                  | 9.39                                                                                   | [14]   |
|                    | NVP     | 17.60                                | 25700000            | 9.96                                                                                  | 10.51                                                                                 | 10.98                                                                                 | 11.39                                                                                  | [15]   |
|                    | Sty     | 32.51                                | 42657952            | 4.45                                                                                  | 5.47                                                                                  | 6.34                                                                                  | 7.09                                                                                   | [16]   |
|                    | VAc     | 20.40                                | 13500000            | 8.19                                                                                  | 8.83                                                                                  | 9.37                                                                                  | 9.84                                                                                   | [17]   |

Table S3: List with monomer parameters classified by type (acrylates, H-bonding monomers, methacrylates and other). The molecular weight *MW*, dipole moment *DP*, boiling point *BP* and the Gibbs free energy *GFE* were predicted with chemdraw. The other parameters were researched from literature. The *A\_value* is the substituent effect on the C2 carbon of the polymerising double bond, the *R\_value* is the substituent effect on the moiety chain. *H\_acc* and *H\_don* are the H-bonding effects, *A1\** and *A2\** are the dissociation constants. Colour highlights indicate which features were used in the final predictions of  $k_p$ .

|                    | Monomer | MW /<br>g·mol <sup>-1</sup> | DP   | BP / K  | GFE / J | A_value<br>[18] | R_value<br>[18] | H_acc<br>[19] | H_don<br>[19] | A1*<br>[20] | A2* |
|--------------------|---------|-----------------------------|------|---------|---------|-----------------|-----------------|---------------|---------------|-------------|-----|
| Acrylates          | BA      | 128.17                      | 2.27 | 397     | -273.05 | 0.00            | 11.28           | 0             | -0.5          | -2.8        | 1   |
|                    | BeA     | 380.60                      | 2.28 | 691     | -124.33 | 0.00            | 12.67           | 0             | -0.5          | -2.8        | 1   |
|                    | BnA     | 162.18                      | 2.40 | 506     | -138.22 | 0.00            | 13.08           | -2.6          | 0             | -2.8        | 1   |
|                    | C17A    | 310.50                      | 3.17 | 633     | -166.43 | 0.00            | 12.67           | 0             | -0.5          | -2.8        | 1   |
|                    | C21A    | 366.60                      | 2.76 | 679     | -132.75 | 0.00            | 12.71           | 0             | -0.5          | -2.8        | 1   |
|                    | EEA     | 144.17                      | 3.91 | 442     | -380.89 | 0.00            | 13.43           | -5.1          | 0             | -2.8        | 1   |
|                    | EHA     | 184.27                      | 2.96 | 490     | -244.65 | 0.00            | 12.46           | 0             | -0.5          | -2.8        | 1   |
|                    | iBoA    | 208.30                      | 2.37 | 516     | -142.37 | 0.00            | 12.42           | 0             | -0.5          | -2.8        | 1   |
|                    | INA-A   | 198.30                      | 2.50 | 509     | -236.23 | 0.00            | 12.71           | 0             | -0.5          | -2.8        | 1   |
|                    | MA      | 86.09                       | 2.23 | 349     | -301.15 | 0.00            | 12.71           | 0             | -0.5          | -2.8        | 1   |
|                    | PHA     | 212.33                      | 2.50 | 527     | -227.81 | 0.00            | 12.44           | 0             | -0.5          | -2.8        | 1   |
|                    | SA      | 324.50                      | 2.67 | 644     | -158.01 | 0.00            | 12.71           | 0             | -0.5          | -2.8        | 1   |
|                    | tBA     | 128.17                      | 2.27 | 397     | -273.05 | 0.00            | 11.28           | 0             | -0.5          | -2.8        | 1   |
| H-Bonding monomers | HCEA    | 243.30                      | 1.74 | 585     | -454.77 | 0.00            | 13.79           | -7.7          | -4.1          | -2.8        | 1   |
|                    | HCPA    | 257.33                      | 4.94 | 587     | -457.34 | 1.91            | 12.15           | -16.8         | -4.1          | -2.8        | 1   |
|                    | HEMA    | 130.14                      | 3.68 | 472     | -429.68 | -1.55           | 13.23           | -5.5          | -3.5          | -2.8        | 647 |
|                    | HPMA    | 144.17                      | 3.43 | 473     | -423.70 | -1.55           | 13.00           | -5.5          | -3.5          | -2.8        | 647 |
|                    | PhCEA   | 235.24                      | 1.07 | 602     | -342.36 | 0.00            | 13.70           | -11           | -3.7          | -2.8        | 1   |
|                    | PhCPA   | 249.26                      | 4.29 | 603     | -344.93 | 2.51            | 12.15           | -13.1         | -3.7          | -2.8        | 1   |
| Methacrylates      | BeMA    | 394.70                      | 1.65 | 699     | -124.46 | -1.55           | 12.67           | 0             | -0.5          | -2.8        | 647 |
|                    | BMA     | 142.20                      | 1.71 | 436     | -276.02 | -1.55           | 13.24           | 0             | -0.5          | -2.8        | 647 |
|                    | BzMA    | 176.21                      | 1.71 | 519     | -138.35 | -1.55           | 13.08           | -2.6          | 0             | -2.8        | 647 |
|                    | CHMA    | 168.23                      | 1.27 | 486     | -234.73 | -1.55           | 12.29           | 0             | -0.5          | -2.8        | 647 |
|                    | DMA     | 254.41                      | 1.50 | 579     | -208.66 | -1.55           | 12.71           | 0             | -0.5          | -2.8        | 647 |
|                    | EHMA    | 198.30                      | 1.59 | 504     | -244.78 | -1.55           | 12.46           | 0             | -0.5          | -2.8        | 647 |
|                    | EMA     | 114.12                      | 1.70 | 391     | -292.86 | -1.55           | 12.58           | 0             | -0.5          | -2.8        | 647 |
|                    | GMA     | 142.15                      | 4.10 | 445     | -309.81 | -1.55           | 13.12           | -5.1          | 0             | -2.8        | 647 |
|                    | iBMA    | 142.20                      | 1.72 | 423     | -278.46 | -1.55           | 12.50           | 0             | -0.5          | -2.8        | 647 |
|                    | iBoMA   | 222.32                      | 1.85 | 529     | -142.50 | -1.55           | 12.42           | 0             | -0.5          | -2.8        | 647 |
|                    | iDeMA   | 226.35                      | 1.61 | 539     | -227.94 | -1.55           | 12.67           | 0             | -0.5          | -2.8        | 647 |
|                    | MMA     | 100.12                      | 1.64 | 367     | -301.28 | -1.55           | 12.71           | 0             | -0.5          | -2.8        | 647 |
|                    | PHMA    | 226.35                      | 1.51 | 539     | -227.94 | -1.55           | 12.09           | 0             | -0.5          | -2.8        | 647 |
|                    | PnMA    | 156.2                       | 1.65 | 457     | -267.60 | -1.55           | 12.75           | 0             | -0.5          | -2.8        | 647 |
| SMA                | 338.6   | 1.96                        | 653  | -158.14 | -1.55   | 12.71           | 0               | -0.5          | -2.8          | 647         |     |
| Other              | BuDE    | 54.09                       | 0.00 | 289     | 97.06   | 0.00            | 0.00            | 0             | 0             | 0           | -   |
|                    | CAN     | 53.06                       | 3.94 | 368     | 133.98  | 0.00            | 14.33           | -4.7          | -4.7          | -3.4        | 10  |
|                    | MAA     | 86.09                       | 1.78 | 433     | -343.24 | -1.55           | 12.36           | 0             | -5            | -2.8        | -   |
|                    | NVF     | 71.08                       | 3.98 | 377     | -9.33   | -1.55           | 3.48            | -6.9          | -1.6          | -3.4        | -   |
|                    | NVP     | 111.14                      | 3.95 | 493     | 70.61   | 0.00            | -0.33           | -5.5          | -4.1          | -3.4        | -   |
|                    | Sty     | 104.15                      | 0.26 | 420     | 155.31  | 0.00            | 1.76            | -2.6          | 0             | -8.4        | 15  |
|                    | VAc     | 86.09                       | 1.54 | 349     | -301.15 | 0.00            | 3.90            | -2.9          | 0             | -5.9        | -   |

Table S4: List with monomer parameters from Chemspider, generated using the ACD/Labs Percepta Platform – PhysChem Module. The selected parameters are the boiling point  $BP$ , the refraction index  $RI$ , the density  $\rho$ , the partition coefficient  $ACDlogP$ , the polarisation, the surface tension and the vapor pressure.

|                    | Monomer | BP / °C | RI    | $\rho$ / g·mL <sup>-1</sup> | ACDlogP | Polarisation | Surface tension | Vapor pressure |   |
|--------------------|---------|---------|-------|-----------------------------|---------|--------------|-----------------|----------------|---|
| Acrylates          | BA      | 145.0   | 1.418 | 0.9                         | 2.39    | 14.3         | 26.7            | 4.8            |   |
|                    | BeA     | 455.7   | 1.455 | 0.9                         | 11.95   | 47.3         | 31.3            | 0              |   |
|                    | BnA     | 228.7   | 1.517 | 1.1                         | 2.27    | 18.5         | 36.1            | 0.1            |   |
|                    | C17A    | 385.6   | 1.451 | 0.9                         | 9.3     | 38.1         | 30.8            | 0              |   |
|                    | C21A    | 442.3   | 1.455 | 0.9                         | 11.42   | 45.5         | 31.2            | 0              |   |
|                    | EEA     | 174.6   | 1.420 | 1                           | 1.02    | 15           | 28.4            | 1.2            |   |
|                    | EHA     | 216.0   | 1.434 | 0.9                         | 4.33    | 21.6         | 28              | 0.1            |   |
|                    | iBoA    | 244.5   | 1.491 | 1                           | 4.22    | 23.7         | 33              | 0              |   |
|                    | INA-A   | 247.3   | 1.437 | 0.9                         | 4.86    | 23.4         | 28.4            | 0              |   |
|                    | MA      | 80.2    | 1.390 | 0.9                         | 0.79    | 8.8          | 23.5            | 86.3           |   |
|                    | PHA     | 266.1   | 1.439 | 0.9                         | 5.39    | 25.3         | 28.7            | 0              |   |
|                    | SA      | 400.2   | 1.452 | 0.9                         | 9.83    | 40           | 30.9            | 0              |   |
| tBA                | 133.0   | 1.418   | 0.9   | 2.02                        | 14.3    | 25.1         | 8.6             |                |   |
| H-Bonding monomers | HCEA    | 357.3   | 1.456 | 1                           | 3.43    | 25.6         | 34.6            | 0              |   |
|                    | HCPA    | 366.2   | 1.456 | 1                           | 3.78    | 27.4         | 33.8            | 0              |   |
|                    | HEMA    | 189.0   | 1.443 | 1.1                         | 0.5     | 13           | 33.7            | 0.2            |   |
|                    | HPMA    | 189.0   | 1.458 | 1.1                         | 1.39    | 14           | 36.1            | 0.6            |   |
|                    | PhCEA   | 218.8   | 1.444 | 1                           | 0.85    | 14.8         | 32.3            | 0              |   |
|                    | PhCPA   | 322.2   | 1.557 | 1.2                         | 2.65    | 24.7         | 45.9            | 0              |   |
| Methacrylates      | BeMA    | 331.7   | 1.549 | 1.2                         | 3       | 26.5         | 43.7            | 0              |   |
|                    | BMA     | 468.7   | 1.455 | 0.9                         | 12.5    | 49.1         | 31              | 0              |   |
|                    | BzMA    | 160.0   | 1.423 | 0.9                         | 2.94    | 16           | 26.4            | 2.4            |   |
|                    | CHMA    | 247.0   | 1.512 | 1                           | 2.82    | 20.2         | 34.8            | 1              |   |
|                    | DMA     | 210.0   | 1.459 | 1                           | 3.4     | 18.9         | 30.5            | 0.2            |   |
|                    | EHMA    | 322.7   | 1.445 | 0.9                         | 7.19    | 30.7         | 29.6            | 0              |   |
|                    | EMA     | 234.8   | 1.436 | 0.9                         | 4.88    | 23.4         | 27.7            | 0.1            |   |
|                    | GMA     | 120.5   | 1.410 | 0.9                         | 1.88    | 12.4         | 24.7            | 15.2           |   |
|                    | iBMA    | 155.0   | 1.421 | 0.9                         | 2.76    | 16           | 25.4            | 3.1            |   |
|                    | iBoMA   | 263.1   | 1.488 | 1                           | 4.77    | 25.4         | 32.4            | 0              |   |
|                    | iDeMA   | 283.9   | 1.441 | 0.9                         | 5.94    | 27           | 28.4            | 0              |   |
|                    | MMA     | 100.3   | 1.400 | 0.9                         | 1.35    | 10.5         | 23.5            | 36.9           |   |
|                    | PHMA    | -       | -     | -                           | -       | -            | -               | -              | - |
|                    | PnMA    | 191.3   | 1.427 | 0.9                         | 3.47    | 17.9         | 27              | 0.5            |   |
| SMA                | 414.3   | 1.452   | 0.9   | 10.38                       | 41.8    | 30.6         | 0               |                |   |
| Other              | BuDE    | -4.4    | 1.389 | 0.6                         | 1.86    | 7.9          | 15.9            | 2101           |   |
|                    | CAN     | 77.3    | 1.385 | 0.8                         | 0.19    | 6.2          | 25              | 97.1           |   |
|                    | MAA     | 160.5   | 1.430 | 1                           | 0.83    | 8.7          | 30.9            | 1.2            |   |
|                    | NVF     | 184.3   | 1.406 | 0.9                         | -0.18   | 7.7          | 25              | 0.7            |   |
|                    | NVP     | 217.6   | 1.593 | 1.1                         | 0.37    | 13.1         | 52.4            | 0.1            |   |
|                    | Sty     | 145.2   | 1.558 | 0.9                         | 2.7     | 14.7         | 31              | 6.2            |   |
|                    | Vac     | 72.5    | 1.390 | 0.9                         | 0.73    | 8.8          | 23.5            | 118.5          |   |

Table S5: Results of figure 3Czc

|                       | Monomer                                  | Abbreviation | Experimental<br>$\ln(k_p / \text{L}\cdot\text{mol}^{-1}\cdot\text{s}^{-1})$<br>T = 25°C | Predicted<br>$\ln(k_p / \text{L}\cdot\text{mol}^{-1}\cdot\text{s}^{-1})$<br>T = 25°C | Relative error<br>[experimental – predicted]<br>$\ln(k_p / \text{L}\cdot\text{mol}^{-1}\cdot\text{s}^{-1})$ T = 25°C |
|-----------------------|------------------------------------------|--------------|-----------------------------------------------------------------------------------------|--------------------------------------------------------------------------------------|----------------------------------------------------------------------------------------------------------------------|
| Acrylates             | n-Butyl acrylate                         | <b>BA</b>    | 9.689923                                                                                | 9.458881                                                                             | 0.231                                                                                                                |
|                       | Stearyl acrylate                         | <b>SA</b>    | 9.908823                                                                                | 9.842755                                                                             | 0.066                                                                                                                |
|                       | 2-Propylheptyl acrylate                  | <b>PHA</b>   | 9.546813                                                                                | 9.659156                                                                             | -0.11                                                                                                                |
|                       | Methyl acrylate                          | <b>MA</b>    | 9.482579                                                                                | 9.381649                                                                             | 0.101                                                                                                                |
|                       | iso-Nonyl acrylate                       | <b>INA-A</b> | 9.745663                                                                                | 9.606882                                                                             | 0.139                                                                                                                |
|                       | Isobornyl acrylate                       | <b>iBoA</b>  | 9.193703                                                                                | 9.757866                                                                             | -0.56                                                                                                                |
|                       | tert-Butyl acrylate                      | <b>tBA</b>   | 9.689923                                                                                | 9.630068                                                                             | 0.06                                                                                                                 |
|                       | Ethoxyethyl acrylate                     | <b>EEA</b>   | 10.088888                                                                               | 9.873488                                                                             | 0.215                                                                                                                |
|                       | Henicosyl acrylate                       | <b>C21A</b>  | 9.744492                                                                                | 9.925102                                                                             | -0.18                                                                                                                |
|                       | Heptadecyl acrylate                      | <b>C17A</b>  | 9.999434                                                                                | 9.827086                                                                             | 0.172                                                                                                                |
|                       | Benzyl acrylate                          | <b>BnA</b>   | 9.861884                                                                                | 9.677131                                                                             | 0.185                                                                                                                |
|                       | Behenyl acrylate                         | <b>BeA</b>   | 10.240103                                                                               | 9.960121                                                                             | 0.28                                                                                                                 |
|                       | 2-Ethylhexyl acrylate                    | <b>EHA</b>   | 9.649756                                                                                | 9.605180                                                                             | 0.045                                                                                                                |
| H-Bonding monomers    | 2-(Phenylcarbamoyloxy)isopropyl acrylate | <b>PhCPA</b> | 9.676210                                                                                | 9.593760                                                                             | 0.082                                                                                                                |
|                       | 2-(Phenylcarbamoyloxy)ethyl acrylate     | <b>PhCEA</b> | 10.531536                                                                               | 10.621373                                                                            | -0.09                                                                                                                |
|                       | 2-hydroxypropyl methacrylate             | <b>HPMA</b>  | 6.679599                                                                                | 6.503095                                                                             | 0.177                                                                                                                |
|                       | 2-(Hexylcarbamoyloxy)isopropyl acrylate  | <b>HCPA</b>  | 10.014403                                                                               | 10.193138                                                                            | -0.18                                                                                                                |
|                       | 2-(Hexylcarbamoyloxy)ethyl acrylate      | <b>HCEA</b>  | 10.337119                                                                               | 10.430283                                                                            | -0.09                                                                                                                |
|                       | Hydroxyethyl methacrylate                | <b>HEMA</b>  | 7.164720                                                                                | 6.324925                                                                             | 0.84                                                                                                                 |
| Methacrylates         | iso-bornyl methacrylate                  | <b>iBoMA</b> | 6.315358                                                                                | 6.401280                                                                             | -0.09                                                                                                                |
|                       | Stearyl methacrylate                     | <b>SMA</b>   | 6.385194                                                                                | 6.046577                                                                             | 0.339                                                                                                                |
|                       | n-Pentyl methacrylate                    | <b>PnMA</b>  | 6.006353                                                                                | 5.948854                                                                             | 0.057                                                                                                                |
|                       | Methyl methacrylate                      | <b>MMA</b>   | 5.777652                                                                                | 6.199693                                                                             | -0.42                                                                                                                |
|                       | iso-decyl methacrylate                   | <b>iDeMA</b> | 5.973810                                                                                | 6.055019                                                                             | -0.08                                                                                                                |
|                       | iso-butyl methacrylate                   | <b>iBMA</b>  | 5.991465                                                                                | 5.969650                                                                             | 0.022                                                                                                                |
|                       | Butyl methacrylate                       | <b>BMA</b>   | 5.913503                                                                                | 5.983812                                                                             | -0.07                                                                                                                |
|                       | Ethyl methacrylate                       | <b>EMA</b>   | 5.780744                                                                                | 6.162680                                                                             | -0.38                                                                                                                |
|                       | 2-ethylhexyl methacrylate                | <b>EHMA</b>  | 5.973810                                                                                | 6.246495                                                                             | -0.27                                                                                                                |
|                       | Dodecyl methacrylate                     | <b>DMA</b>   | 6.265301                                                                                | 6.178625                                                                             | 0.087                                                                                                                |
|                       | Cyclohexyl methacrylate                  | <b>CHMA</b>  | 6.378426                                                                                | 6.244365                                                                             | 0.134                                                                                                                |
|                       | Benzyl methacrylate                      | <b>BzMA</b>  | 6.487684                                                                                | 6.518645                                                                             | -0.03                                                                                                                |
|                       | Behenyl methacrylate                     | <b>BeMA</b>  | 6.458338                                                                                | 6.504005                                                                             | -0.05                                                                                                                |
| Glycidyl methacrylate | <b>GMA</b>                               | 6.188264     | 6.324925                                                                                | -0.14                                                                                |                                                                                                                      |
| Other                 | Styrene                                  | <b>Sty</b>   | 4.454347                                                                                | 4.599294                                                                             | -0.14                                                                                                                |
|                       | Acrylonitrile                            | <b>CAN</b>   | 8.185071                                                                                | 8.590136                                                                             | -0.41                                                                                                                |

Table S6: List with monomer collected experimental parameters from Chemspider, including the boiling point *BP*, refraction index *RI* and the density  $\rho$ . The  $A_2^*$  dissociation constant parameter is included as well. Monomers that had a value for all of four categories were highlighted in bold and coloured according to their coloration used Figure 4.

|                           | Monomer     | BP / °C     | RI            | $\rho$ / g·mL <sup>-1</sup> | $A_2^*$    |
|---------------------------|-------------|-------------|---------------|-----------------------------|------------|
| <b>Acrylates</b>          | <b>BA</b>   | <b>145</b>  | <b>1.418</b>  | <b>0.895</b>                | <b>1</b>   |
|                           | BeA         | -           | -             | 0                           | 1          |
|                           | BnA         | 111         | -             | 1.06                        | 1          |
|                           | EEA         | 174         | -             | -                           | 1          |
|                           | iBoa        | 119         | 1.476         | -                           | 1          |
|                           | <b>MA</b>   | <b>80.5</b> | <b>1.403</b>  | <b>0.956</b>                | <b>1</b>   |
|                           | <b>tBA</b>  | <b>121</b>  | <b>1.411</b>  | <b>0.883</b>                | <b>1</b>   |
| <b>H-bonding monomers</b> | <b>HEMA</b> | <b>250</b>  | <b>1.453</b>  | <b>1.071</b>                | <b>647</b> |
| <b>Methacrylates</b>      | <b>BzMA</b> | <b>162</b>  | <b>1.424</b>  | <b>0.894</b>                | <b>647</b> |
|                           | <b>CHMA</b> | <b>231</b>  | <b>1.514</b>  | <b>1.04</b>                 | <b>647</b> |
|                           | <b>DMA</b>  | <b>72</b>   | <b>1.4577</b> | <b>0.97</b>                 | <b>647</b> |
|                           | <b>EHMA</b> | <b>142</b>  | <b>1.445</b>  | <b>0.873</b>                | <b>647</b> |
|                           | <b>GMA</b>  | <b>118</b>  | <b>1.413</b>  | <b>0.917</b>                | <b>647</b> |
|                           | <b>iBMA</b> | <b>155</b>  | <b>1.42</b>   | <b>0.889</b>                | <b>647</b> |
|                           | <b>MMA</b>  | <b>100</b>  | <b>1.414</b>  | <b>0.939</b>                | <b>647</b> |
|                           | <b>SMA</b>  | <b>-</b>    | <b>-</b>      | <b>0.86</b>                 | <b>647</b> |
| <b>Other</b>              | BuDE        | -4.5        | 1.4292        | 0.62                        | -          |
|                           | <b>CAN</b>  | <b>77</b>   | <b>1.391</b>  | <b>0.806</b>                | <b>10</b>  |
|                           | MAA         | 163         | 1.431         | 1.015                       | -          |
|                           | NVF         | 210         | 1.494         | 1.014                       | -          |
|                           | NVP         | 92          | 1.512         | 1.044                       | -          |
|                           | <b>Sty</b>  | <b>145</b>  | <b>1.546</b>  | <b>0.906</b>                | <b>15</b>  |
|                           | VAc         | 72          | 1.395         | 0.932                       | -          |

Table S7: Coefficients of the model with acrylates and methacrylates (Standard deviation of feature, ridge regression fit coefficient and relative importance)

| Parameters                    | Standard Deviation | Coefficients | Importance |
|-------------------------------|--------------------|--------------|------------|
| Polarizability                | 808.4313           | 0.00268      | 2.166596   |
| Dissociation constant 2       | 328.9271           | -0.00555     | 1.825545   |
| Molecular weight              | 89.20704           | 0.00149      | 0.132918   |
| Effect of H-donor             | 1.477476           | -0.06087     | 0.089934   |
| Inductive effect of tailgroup | 0.384931           | 0.00162      | 0.000624   |
| Effect of H-acceptor          | 0.181007           | 0.01008      | 0.001825   |
| Inductive effect              | 0.790796           | 0.00001      | 7.91E-06   |
| Dissociation constant 1       | 9.05E-16           | 0            | 0          |

Table S8: Coefficients of the model with acrylates, methacrylates and H-bonding monomers (Standard deviation of feature, ridge regression fit coefficient and relative importance)

| Parameters                    | Standard Deviation | Coefficients | Importance |
|-------------------------------|--------------------|--------------|------------|
| Dissociation constant 2       | 327.8574           | -0.00636     | 2.085173   |
| Polarizability                | 10.96917           | 0.10146      | 1.112932   |
| Molecular weight              | 83.51009           | -0.01179     | 0.984584   |
| Effect of H-acceptor          | 4.292892           | -0.106       | 0.455047   |
| Inductive effect              | 1.058983           | -0.37847     | 0.400793   |
| Effect of H-donor             | 1.323033           | -0.07107     | 0.094028   |
| Inductive effect of tailgroup | 0.468596           | 0.08725      | 0.040885   |
| Dissociation constant 1       | 1.35E-15           | 0            | 0          |

Table S9: Coefficients of the model with acrylates, methacrylates and others (Standard deviation of feature, ridge regression fit coefficient and relative importance)

| Parameters                    | Standard Deviation | Coefficients | Importance |
|-------------------------------|--------------------|--------------|------------|
| Dissociation constant 2       | 327.7552           | -0.00526     | 1.723992   |
| Molecular weight              | 92.44408           | 0.01385      | 1.280351   |
| Polarizability                | 11.97967           | -0.08162     | 0.977781   |
| Inductive effect of tailgroup | 2.09159            | 0.17573      | 0.367555   |
| Dissociation constant 1       | 1.041882           | 0.10051      | 0.10472    |
| Effect of H-acceptor          | 1.65423            | 0.02534      | 0.041918   |
| Effect of H-donor             | 0.819197           | 0.02161      | 0.017703   |
| Inductive effect              | 0.789821           | -0.00071     | 0.000561   |

Table S10: Coefficients of the model with acrylates, methacrylates, H-bonding monomers and others (Standard deviation of feature, ridge regression fit coefficient and relative importance)

| Parameters                    | Standard Deviation | Coefficients | Importance |
|-------------------------------|--------------------|--------------|------------|
| Dissociation constant 2       | 325.9089           | -0.00676     | 2.203144   |
| Molecular weight              | 86.79396           | 0.01508      | 1.308853   |
| Polarizability                | 11.15569           | -0.10046     | 1.120701   |
| Dissociation constant 1       | 0.94902            | 1.09465      | 1.038845   |
| Inductive effect              | 1.037659           | -0.57508     | 0.596737   |
| Inductive effect of tailgroup | 1.934587           | -0.13211     | 0.255578   |
| Effect of H-donor             | 1.438212           | -0.06727     | 0.096749   |
| Effect of H-acceptor          | 4.185084           | -0.00045     | 0.001883   |



## Regression analysis

Each experiment, where possible, was done trying three different methods: linear regression, cross validated Ridge regression and Lasso (Least Absolute Shrinkage and Selection Operator) regression. The term linear regression and multivariate linear regression is in here used interchangeably since multiple parameters were combined. Simply said, multivariate linear regression is a combination of several linear regressions on independent variables for one dependant variable. They are the most straightforward and least complex regressions. A linear model can be written as:

$$y_{ii} = \beta_0 + \beta_{i1}x_{ii1} + \beta_{i2}x_{ii2} + \dots + \beta_{iii}x_{iii} + \varepsilon_{ii}, \quad \text{for } i = 1, \dots, n \text{ and } j = 1, \dots, p \quad (2)$$

The linear regression used in this project utilises ordinary least squares to estimate the values of  $\beta_i$ , thereby minimising the sum of the squared residuals. However, the simplicity of the regression can result in over-generalisation and over-fitting. Both Ridge and Lasso regression are simple techniques to reduce model complexity.

Ridge regression is similar to linear regression but adds a penalty, also known as the penalty term  $\lambda$ , equivalent to the square of the magnitude of the coefficients. Thus, the coefficients are smaller, reducing the overall complexity. [21]

$$\min_{ii=1}^M (y_{ii} - \hat{y}_{ii})^2 + \lambda \sum_{ii=0}^p w_{ii}^2 = \min_{ii=1}^M (y_{ii} - \sum_{ii=0}^p w_{ii} * x_{iii})^2 + \lambda \sum_{ii=0}^p w_{ii}^2, \quad (3)$$

Lasso regression is like Ridge regression; however, the cost function instead minimises the absolute sum of coefficients. Thus, in contrast to Ridge regression, Lasso leaves out complete parameters, which is useful for feature selection.

$$\min_{ii=1}^M (y_{ii} - \hat{y}_{ii})^2 + \lambda \sum_{ii=0}^p |w_{ii}| = \min_{ii=1}^M (y_{ii} - \sum_{ii=0}^p w_{ii} * x_{iii})^2 + \lambda \sum_{ii=0}^p |w_{ii}|, \quad (4)$$

## Leave One Out Cross Validation

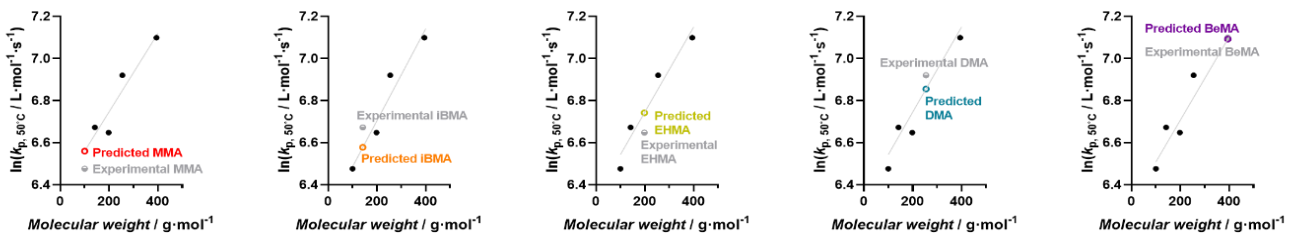

Determine each regression on the dataset while leaving out one data point. Using the regression, predict the value of the left-out data point.

|      | MW     | Experimental | Predicted |
|------|--------|--------------|-----------|
| MMA  | 100.12 | 6.48         | 6.56      |
| iBMA | 142.20 | 6.67         | 6.58      |
| EHMA | 198.30 | 6.65         | 6.74      |
| DMA  | 254.41 | 6.92         | 6.85      |
| BeMA | 394.70 | 7.10         | 7.09      |

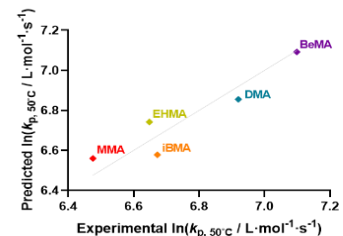

## Supplemental regression analysis plots

All  $k_p$  and  $\ln(k_p)$  data [Molecular weight,  $a_{\text{value}}$ ]

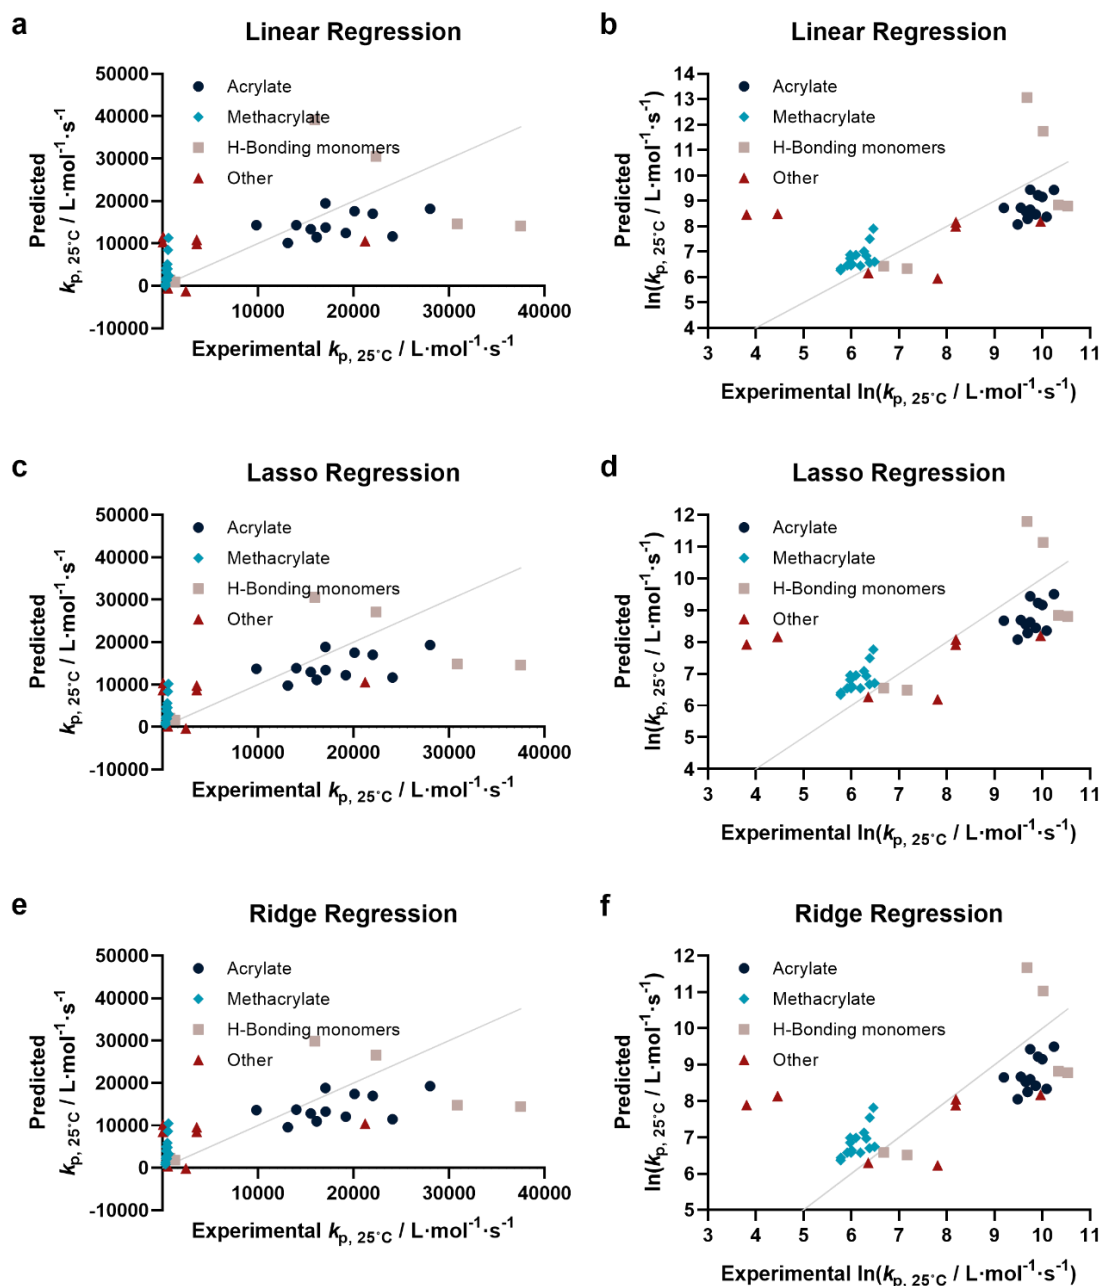

Figure 1: Correlation plots of the predicted propagation rate constant ( $k_p$ ) and the natural logarithm of the predicted propagation rate constant ( $\ln(k_p)$ ) at 25°C versus their experimental values for different regressions. The Linear (a and b), Lasso (c and d) and Ridge (e and f) regression were done using all available data ( $n = 41$ ). The predictions were generated with the molecular weight and a distinction between the type of monomer (blue = acrylate, teal = methacrylate, grey = H-binding monomers and red = other monomers) as parameters. The metrics of each figure are annotated in the table below.

|                      | Figure a | Figure b | Figure c | Figure d | Figure e | Figure f |
|----------------------|----------|----------|----------|----------|----------|----------|
| RMSE                 | 7.892E3  | 1.470    | 7.085E3  | 1.330    | 7.114E3  | 1.334    |
| R2 Value             | 0.434    | 0.414    | 0.544    | 0.521    | 0.0540   | 0.518    |
| Variance Predictions | 6.865E7  | 2.167    | 5.053E7  | 1.645    | 4.782E7  | 1.563    |
| Variance Residuals   | 6.380E7  | 2.213    | 5.145E7  | 1.813    | 5.187E7  | 1.824    |

All available  $K_p$  and  $\ln(K_p)$  data [Molecular weight,  $a_{\text{value}}$ ,  $R_{\text{value}}$ , H-bonding parameters, Dissociation constants, ChempSpider parameters (Polarizability)]

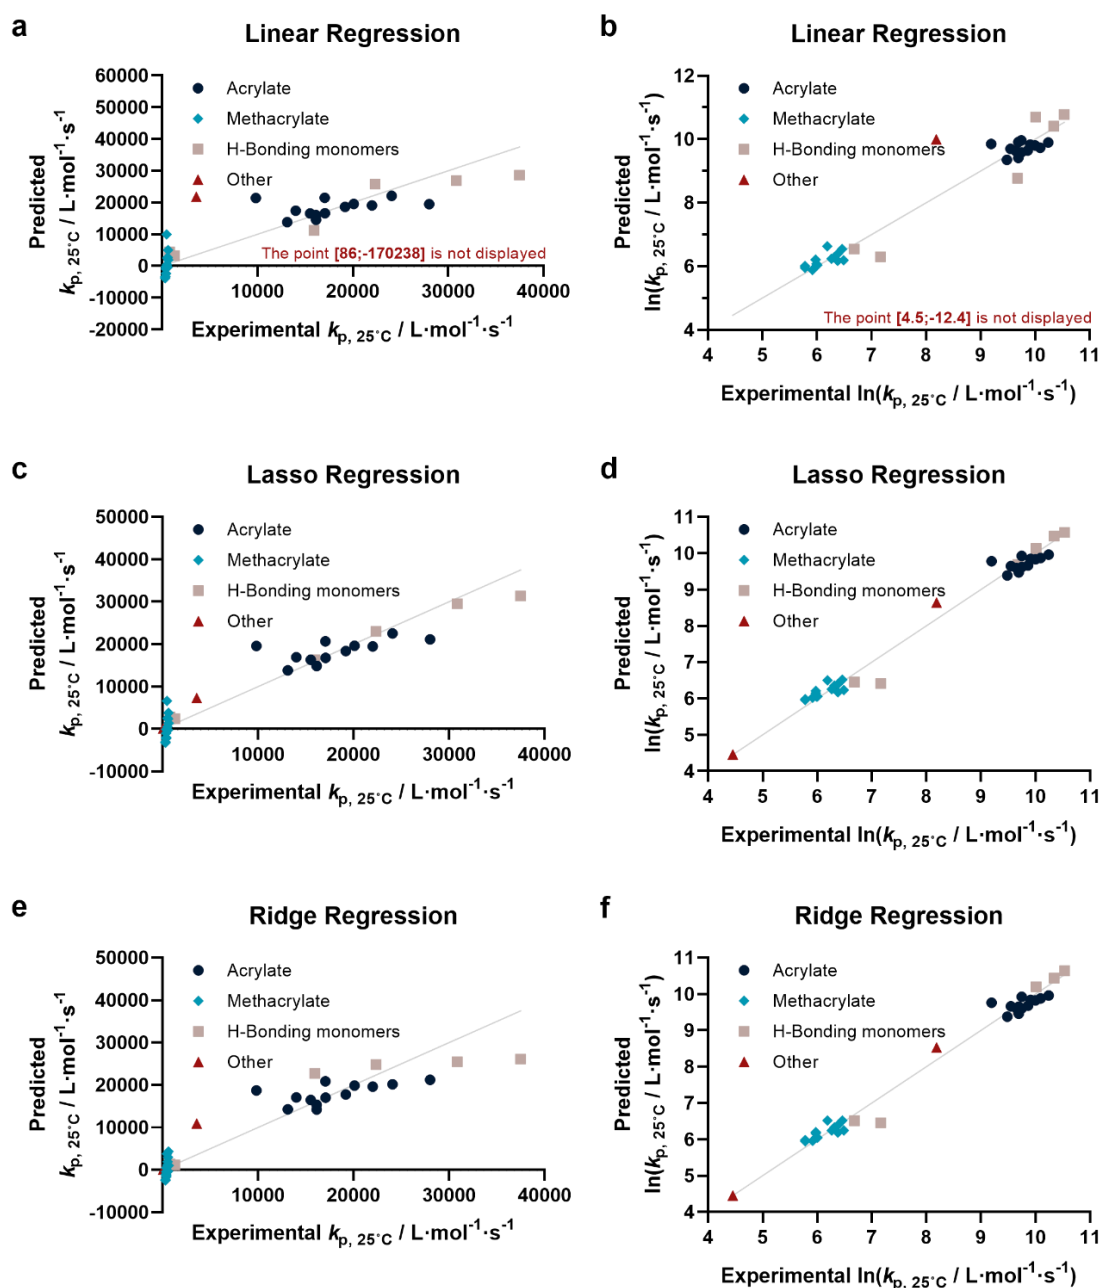

Figure 2: Correlation plots of the predicted propagation rate constant ( $k_p$ ) and the natural logarithm of the predicted propagation rate constant ( $\ln(k_p)$ ) at 25°C versus their experimental values for different regressions. The Linear (a and b), Lasso (c and d) and Ridge (e and f) regression were done using all available data ( $n = 35$ ). The predictions were generated with the molecular weight and a distinction between the type of monomer (blue = acrylate, teal = methacrylate, grey = H-binding monomers and red = other monomers), inductive effect of the tail group, the effect of H-donors and H-acceptors, and the dissociation constants as parameters. The metrics of each figure are annotated in the table below.

|                      | Figure a | Figure b | Figure c | Figure d | Figure e | Figure f |
|----------------------|----------|----------|----------|----------|----------|----------|
| RMSE                 | 2.924E4  | 2.889    | 3.113E3  | 0.235    | 3.784E3  | 0.223    |
| R2 Value             | -6.420   | -1.350   | 0.916    | 0.984    | 0.876    | 0.986    |
| Variance Predictions | 1.010E9  | 15.005   | 1.039E8  | 3.471    | 9.580E7  | 3.484    |
| Variance Residuals   | 8.595E8  | 8.386    | 9.977E6  | 0.057    | 1.474E7  | 0.051    |

# Part 2: Tests with cross validation

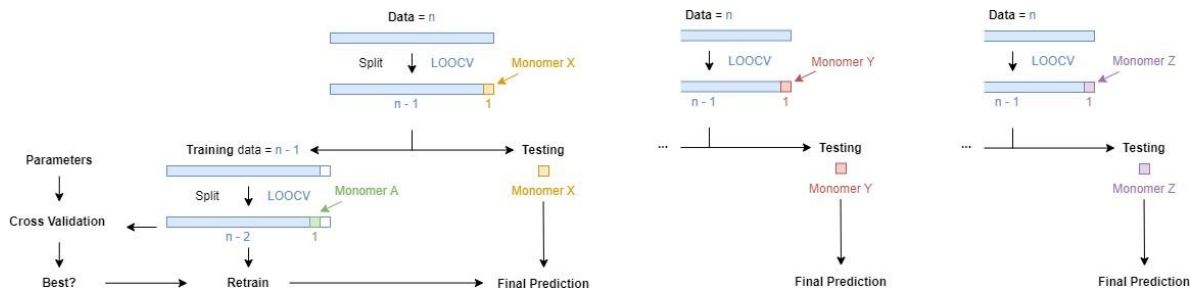

All  $\ln(k_p)$  data [Molecular weight]

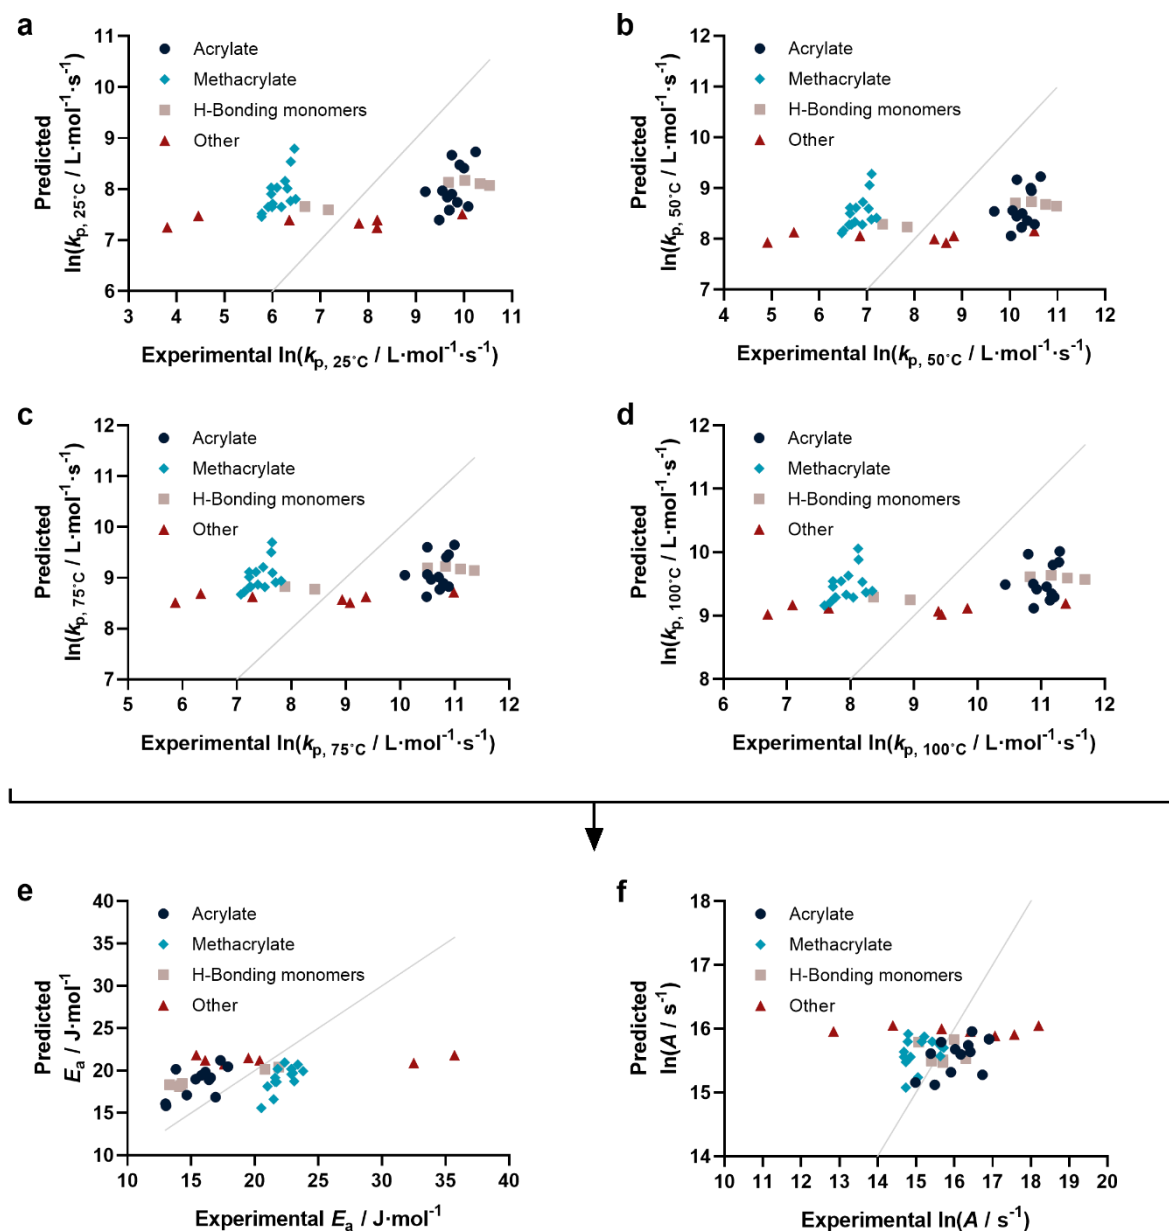

Figure 3: Correlation plots of the natural logarithm of the predicted propagation rate constant ( $\ln(k_p)$ ) versus the experimental  $\ln(k_p)$  for different temperatures:  $25^\circ\text{C}$ ,  $50^\circ\text{C}$ ,  $75^\circ\text{C}$  and  $100^\circ\text{C}$  for a, b, c and d respectively. The predictions were generated via a cross validated Ridge regression using all available data ( $n = 41$ ) with the molecular weight as parameter. From the predicted  $\ln(k_p)$  results, a prediction for the activation energy ( $E_a$ ) and the natural logarithm of the pre-exponential factor ( $\ln(A)$ ) was made using the Arrhenius plot and formula. The predictions were plotted against their experimental value (e and f). The metrics of each figure are annotated in the table below.

|                      | Figure a | Figure b | Figure c | Figure d | Figure e | Figure f |
|----------------------|----------|----------|----------|----------|----------|----------|
| RMSE                 | 1.839    | 1.722    | 1.623    | 1.540    | 4.408    | 0.932    |
| R2 Value             | 0.083    | 0.076    | 0.069    | 0.063    | 0.152    | 0.030    |
| Variance Predictions | 3.468    | 0.123    | 0.095    | 0.073    | 2.687    | 0.065    |
| Variance Residuals   | 1.722    | 3.039    | 2.700    | 2.431    | 19.912   | 0.891    |

All  $\ln(k_p)$  data [Molecular weight, a\_value]

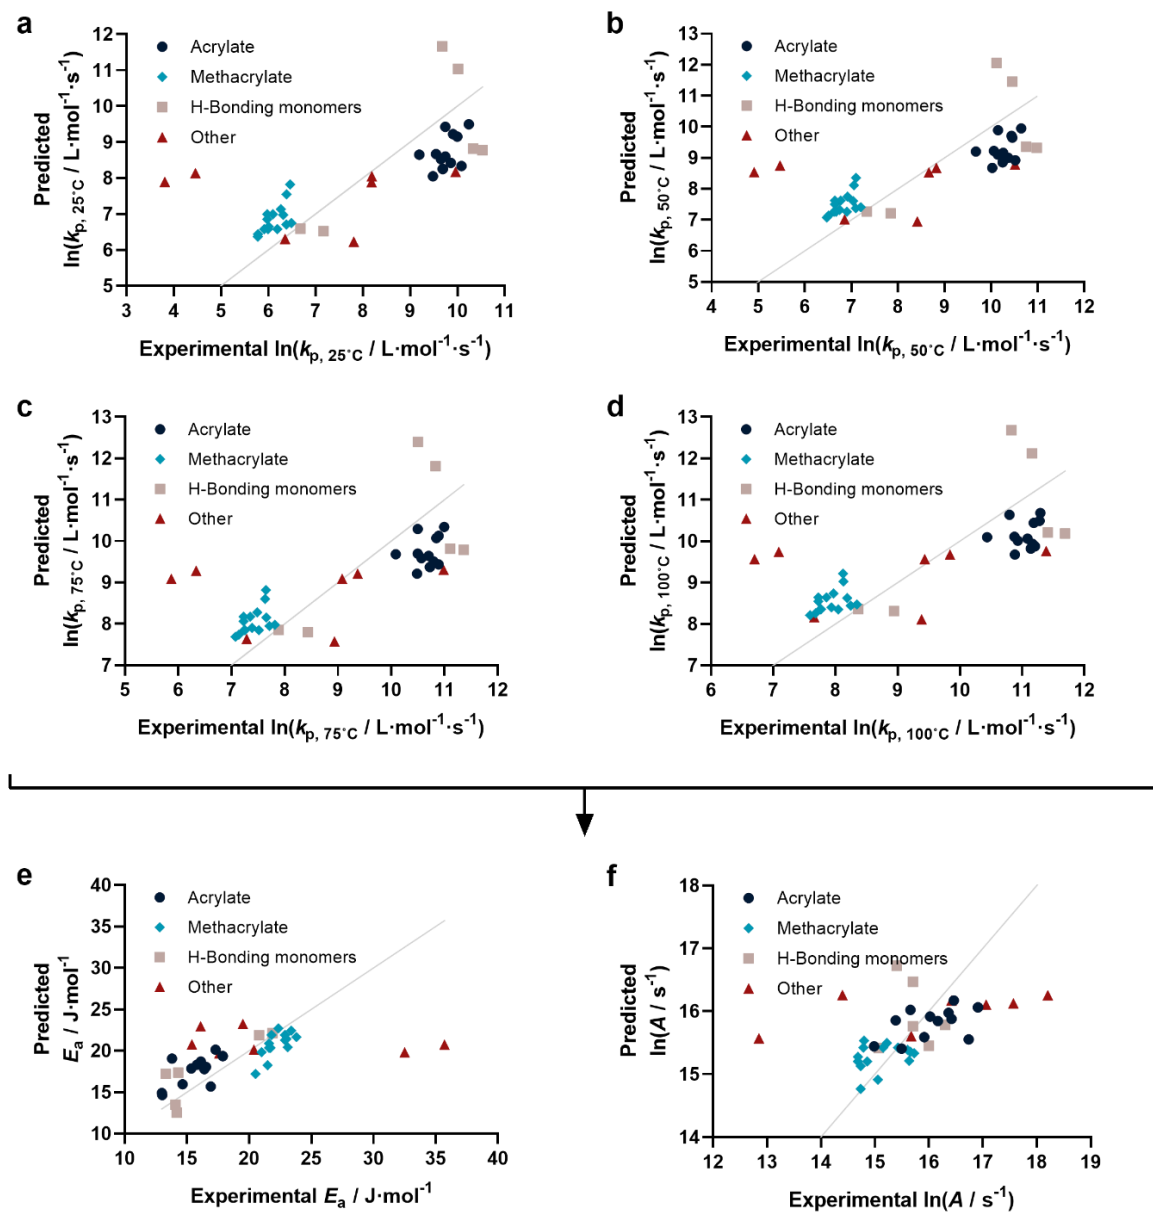

Figure 4: Correlation plots of the natural logarithm of the predicted propagation rate constant ( $\ln(k_p)$ ) versus the experimental  $\ln(k_p)$  for different temperatures: 25°C, 50°C, 75°C and 100°C for a, b, c and d respectively. The predictions were generated via a cross validated Ridge regression using all available data ( $n = 41$ ) with the molecular weight and a distinction between the type of monomer (blue = acrylate, teal = methacrylate, grey = H-binding monomers and red = other monomers) as parameters. From the predicted  $\ln(k_p)$  results, a prediction for the activation energy ( $E_a$ ) and the natural logarithm of the pre-exponential factor ( $\ln(A)$ ) was made using the Arrhenius plot and formula. The predictions were plotted against their experimental value (e and f). The metrics of each figure are annotated in the table below.

|                      | Figure a | Figure b | Figure c | Figure d | Figure e | Figure f |
|----------------------|----------|----------|----------|----------|----------|----------|
| RMSE                 | 1.334    | 1.232    | 1.146    | 1.076    | 3.914    | 0.817    |
| R2 Value             | 0.518    | 0.527    | 0.536    | 0.543    | 0.332    | 0.255    |
| Variance Predictions | 1.561    | 1.377    | 1.228    | 1.106    | 6.943    | 0.183    |
| Variance Residuals   | 1.825    | 1.555    | 1.348    | 1.186    | 15.703   | 0.684    |

All  $\ln(k_p)$  data [Molecular weight, Inductive effects (a\_value, R\_Value)]

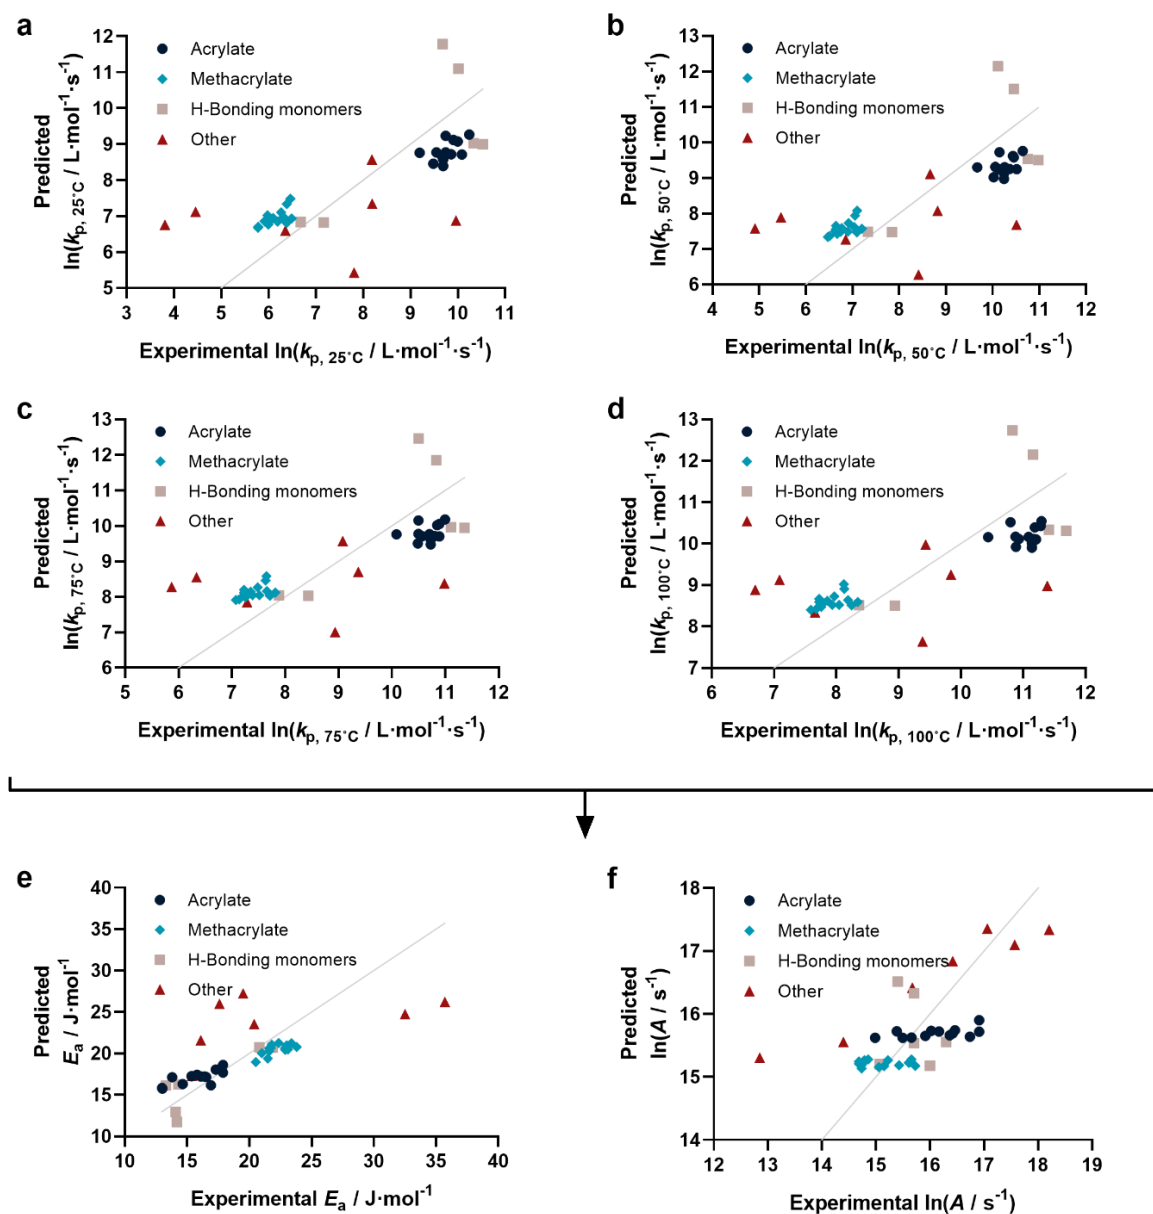

Figure 5: Correlation plots of the natural logarithm of the predicted propagation rate constant ( $\ln(k_p)$ ) versus the experimental  $\ln(k_p)$  for different temperatures: 25°C, 50°C, 75°C and 100°C for a, b, c and d respectively. The predictions were generated via a cross validated Ridge regression using all available data ( $n = 41$ ) with the molecular weight and a distinction between the type of monomer (blue = acrylate, teal = methacrylate, grey = H-binding monomers and red = other monomers) and inductive effect of the tail group as parameters. From the predicted  $\ln(k_p)$  results, a prediction for the activation energy ( $E_a$ ) and the natural logarithm of the pre-exponential factor ( $\ln(A)$ ) was made using the Arrhenius plot and formula. The predictions were plotted against their experimental value (e and f). The metrics of each figure are annotated in the table below.

|                      | Figure a | Figure b | Figure c | Figure d | Figure e | Figure f |
|----------------------|----------|----------|----------|----------|----------|----------|
| RMSE                 | 1.256    | 1.171    | 1.100    | 1.041    | 3.271    | 0.708    |
| R2 Value             | 0.572    | 0.572    | 0.572    | 0.572    | 0.533    | 0.441    |
| Variance Predictions | 1.647    | 1.424    | 1.249    | 1.111    | 10.839   | 0.363    |
| Variance Residuals   | 1.618    | 1.407    | 1.241    | 1.110    | 10.970   | 0.513    |

The  $\ln(K_p)$  data of all acrylates and methacrylates [Molecular weight, Inductive effects ( $a_{\text{value}}$ ,  $R_{\text{Value}}$ )]

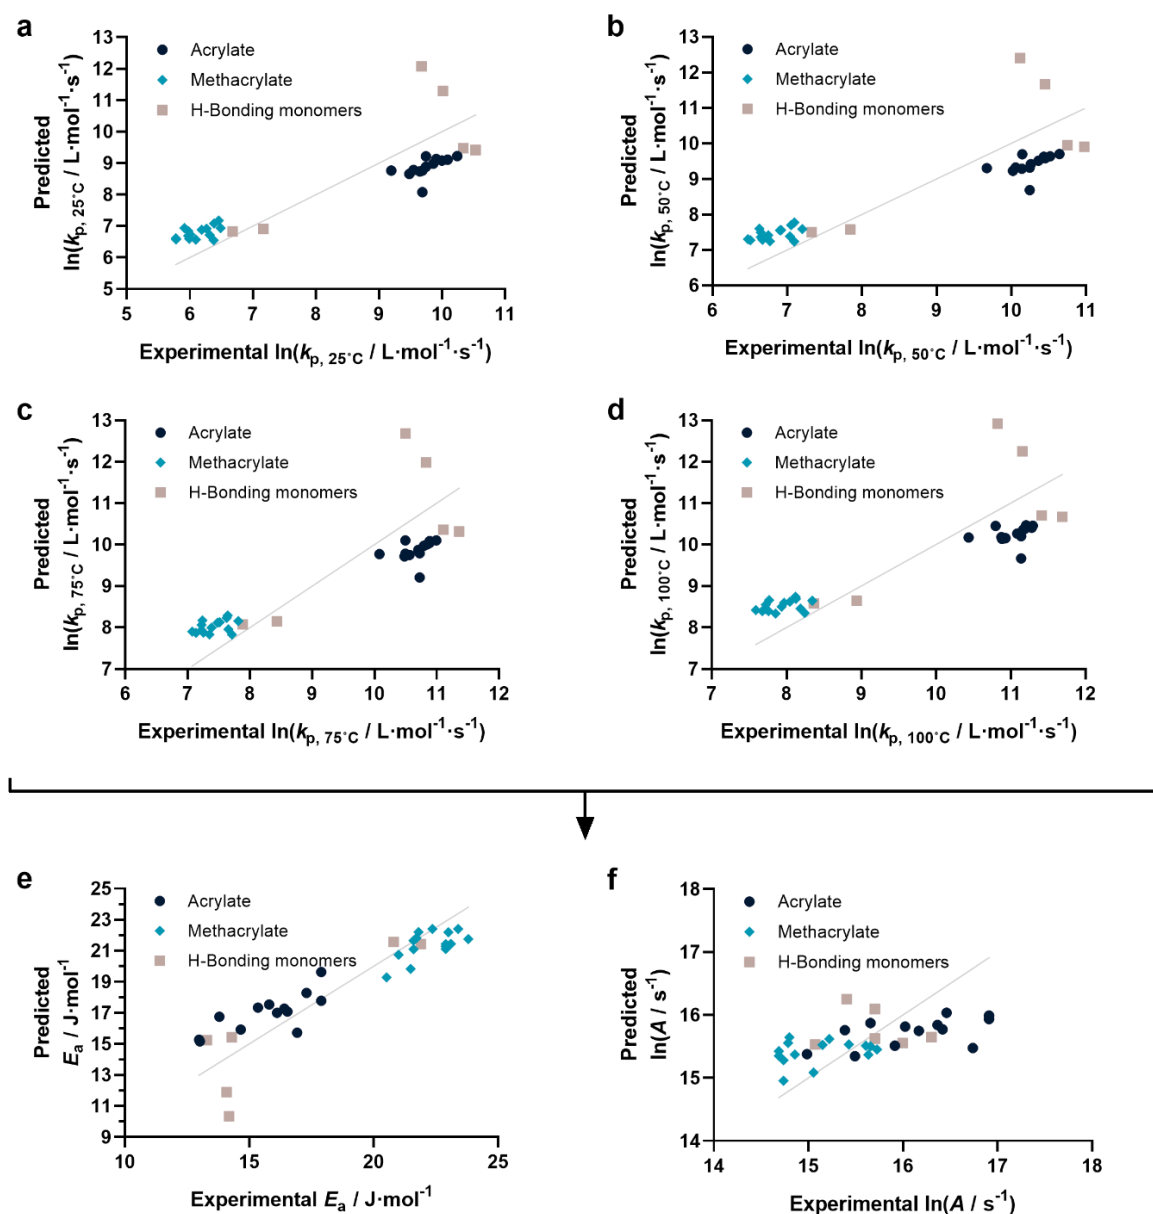

Figure 6: Correlation plots of the natural logarithm of the predicted propagation rate constant ( $\ln(k_p)$ ) versus the experimental  $\ln(k_p)$  for different temperatures: 25°C, 50°C, 75°C and 100°C for a, b, c and d respectively. The predictions were generated via a cross validated Ridge regression using all acrylates and methacrylates ( $n = 34$ ) with the molecular weight and a distinction between the type of monomer (blue = acrylate, teal = methacrylate, grey = H-binding monomers and red = other monomers) and inductive effect of the tail group as parameters. From the predicted  $\ln(k_p)$  results, a prediction for the activation energy ( $E_a$ ) and the natural logarithm of the pre-exponential factor ( $\ln(A)$ ) was made using the Arrhenius plot and formula. The predictions were plotted against their experimental value (e and f). The metrics of each figure are annotated in the table below.

|                      | Figure a | Figure b | Figure c | Figure d | Figure e | Figure f |
|----------------------|----------|----------|----------|----------|----------|----------|
| RMSE                 | 0.899    | 0.861    | 0.829    | 0.803    | 1.546    | 0.545    |
| R2 Value             | 0.761    | 0.753    | 0.745    | 0.736    | 0.822    | 0.301    |
| Variance Predictions | 1.998    | 1.740    | 1.532    | 1.357    | 10.012   | 0.078    |
| Variance Residuals   | 0.834    | 0.764    | 0.708    | 0.664    | 2.461    | 0.306    |



The data  $\ln(K_p)$  of acrylates and methacrylates without H-binding monomers [Molecular weight, Inductive effects (a\_value, R\_Value)]

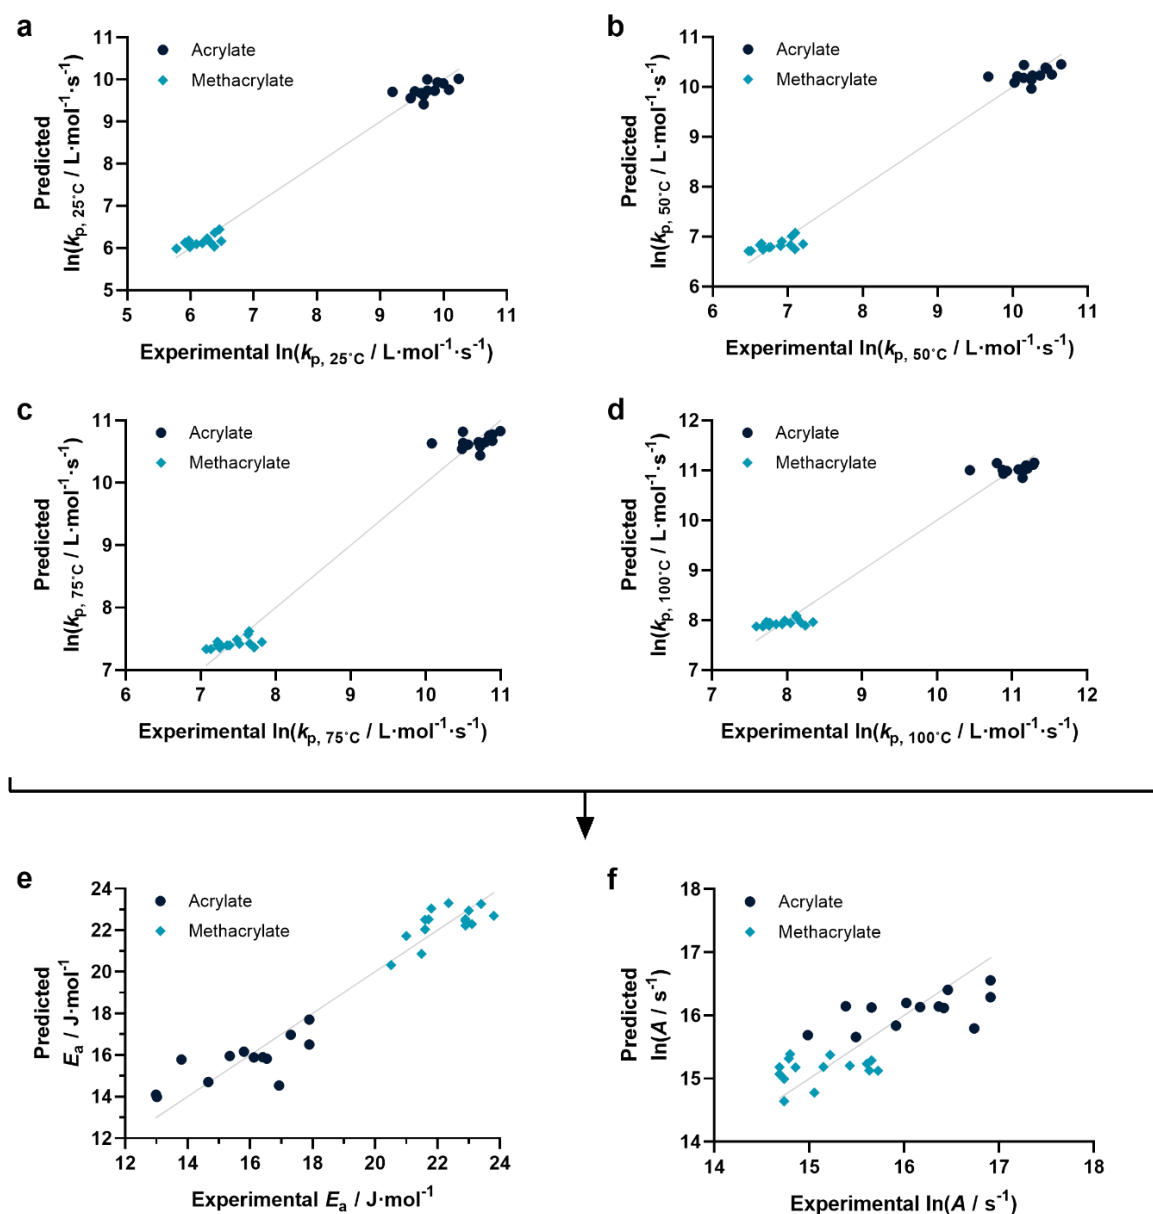

Figure 7: Correlation plots of the natural logarithm of the predicted propagation rate constant ( $\ln(k_p)$ ) versus the experimental  $\ln(k_p)$  for different temperatures: 25°C, 50°C, 75°C and 100°C for a, b, c and d respectively. The predictions were generated via a cross validated Ridge regression using all acrylates and methacrylates without H-binding monomers ( $n = 28$ ) with the molecular weight and a distinction between the type of monomer (blue = acrylate, teal = methacrylate, grey = H-binding monomers and red = other monomers) and inductive effect of the tail group as parameters. From the predicted  $\ln(k_p)$  results, a prediction for the activation energy ( $E_a$ ) and the natural logarithm of the pre-exponential factor ( $\ln(A)$ ) was made using the Arrhenius plot and formula. The predictions were plotted against their experimental value (e and f). The metrics of each figure are annotated in the table below.

|                      | Figure a | Figure b | Figure c | Figure d | Figure e | Figure f |
|----------------------|----------|----------|----------|----------|----------|----------|
| RMSE                 | 0.198    | 0.202    | 0.209    | 0.216    | 0.907    | 0.429    |
| R2 Value             | 0.988    | 0.986    | 0.984    | 0.981    | 0.933    | 0.618    |
| Variance Predictions | 3.273    | 2.905    | 2.607    | 2.362    | 12.203   | 0.284    |
| Variance Residuals   | 0.041    | 0.042    | 0.045    | 0.049    | 0.853    | 0.190    |

All  $\ln(k_p)$  data [Molecular weight,  $a_{\text{value}}$ ,  $R_{\text{value}}$ , Chemdraw (dipole moment, boiling point, melting point, Gibbs Free Energy)]

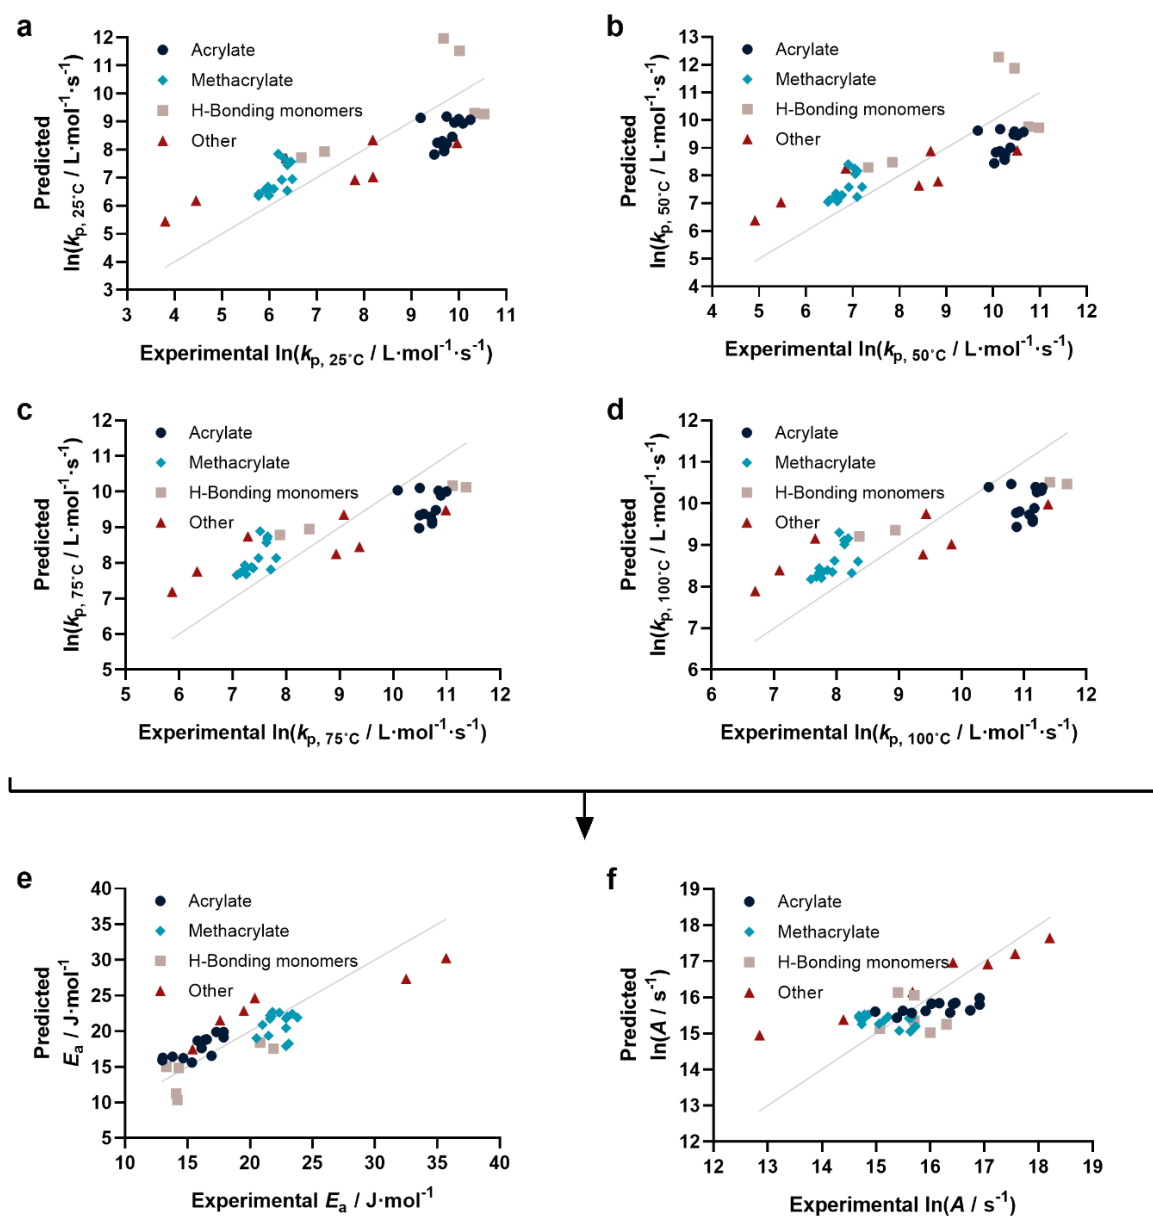

Figure 8: Correlation plots of the natural logarithm of the predicted propagation rate constant ( $\ln(k_p)$ ) versus the experimental  $\ln(k_p)$  for different temperatures: 25°C, 50°C, 75°C and 100°C for a, b, c and d respectively. The predictions were generated via a cross validated Ridge regression using all available data ( $n = 41$ ) with the molecular weight and a distinction between the type of monomer (blue = acrylate, teal = methacrylate, grey = H-binding monomers and red = other monomers), inductive effect of the tail group, dipole moment, boiling point, melting point and Gibbs Free Energy as parameters. From the predicted  $\ln(k_p)$  results, a prediction for the activation energy ( $E_a$ ) and the natural logarithm of the pre-exponential factor ( $\ln(A)$ ) was made using the Arrhenius plot and formula. The predictions were plotted against their experimental value (e and f). The metrics of each figure are annotated in the table below.

|                      | Figure a | Figure b | Figure c | Figure d | Figure e | Figure f |
|----------------------|----------|----------|----------|----------|----------|----------|
| RMSE                 | 1.167    | 1.100    | 1.044    | 0.998    | 2.667    | 0.690    |
| R2 Value             | 0.631    | 0.623    | 0.615    | 0.607    | 0.690    | 0.487    |
| Variance Predictions | 1.775    | 1.504    | 1.292    | 1.124    | 14.206   | 0.345    |
| Variance Residuals   | 1.396    | 1.241    | 1.117    | 1.020    | 7.289    | 0.471    |

The  $\ln(k_p)$  data of all acrylates and methacrylates [Molecular weight,  $a_{\text{value}}$ ,  $R_{\text{value}}$ , Chemdraw (dipole moment, boiling point, melting point, Gibbs Free Energy)]

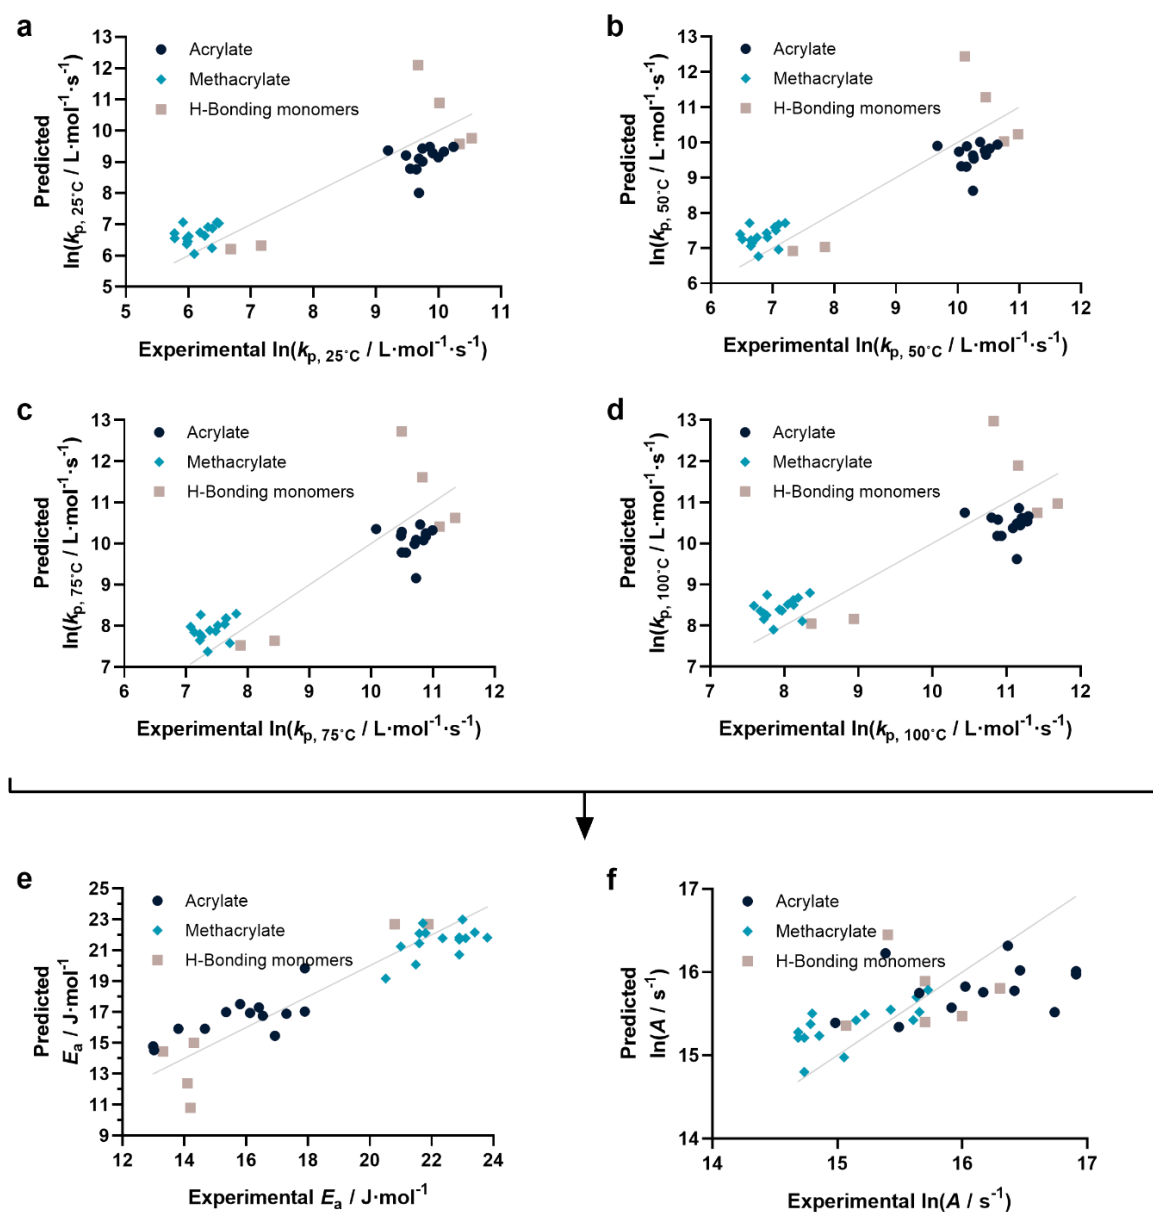

Figure 9: Correlation plots of the natural logarithm of the predicted propagation rate constant ( $\ln(k_p)$ ) versus the experimental  $\ln(k_p)$  for different temperatures: 25°C, 50°C, 75°C and 100°C for a, b, c and d respectively. The predictions were generated via a cross validated Ridge regression using all acrylates and methacrylates ( $n = 34$ ) with the molecular weight and a distinction between the type of monomer (blue = acrylate, teal = methacrylate, grey = H-binding monomers and red = other monomers), inductive effect of the tail group, dipole moment, boiling point, melting point and Gibbs Free Energy as parameters. From the predicted  $\ln(k_p)$  results, a prediction for the activation energy ( $E_a$ ) and the natural logarithm of the pre-exponential factor ( $\ln(A)$ ) was made using the Arrhenius plot and formula. The predictions were plotted against their experimental value (e and f). The metrics of each figure are annotated in the table below.

|                      | Figure a | Figure b | Figure c | Figure d | Figure e | Figure f |
|----------------------|----------|----------|----------|----------|----------|----------|
| RMSE                 | 0.806    | 0.773    | 0.745    | 0.722    | 1.397    | 0.512    |
| R2 Value             | 0.808    | 0.801    | 0.794    | 0.787    | 0.855    | 0.384    |
| Variance Predictions | 2.434    | 2.125    | 1.877    | 1.677    | 11.592   | 0.132    |
| Variance Residuals   | 0.670    | 0.615    | 0.572    | 0.537    | 2.012    | 0.270    |

The  $\ln(k_p)$  data of acrylates and methacrylates without H-binding monomers [Molecular weight,  $a_{\text{value}}$ ,  $R_{\text{value}}$ , Chemdraw (dipole moment, boiling point, melting point, Gibbs Free Energy)]

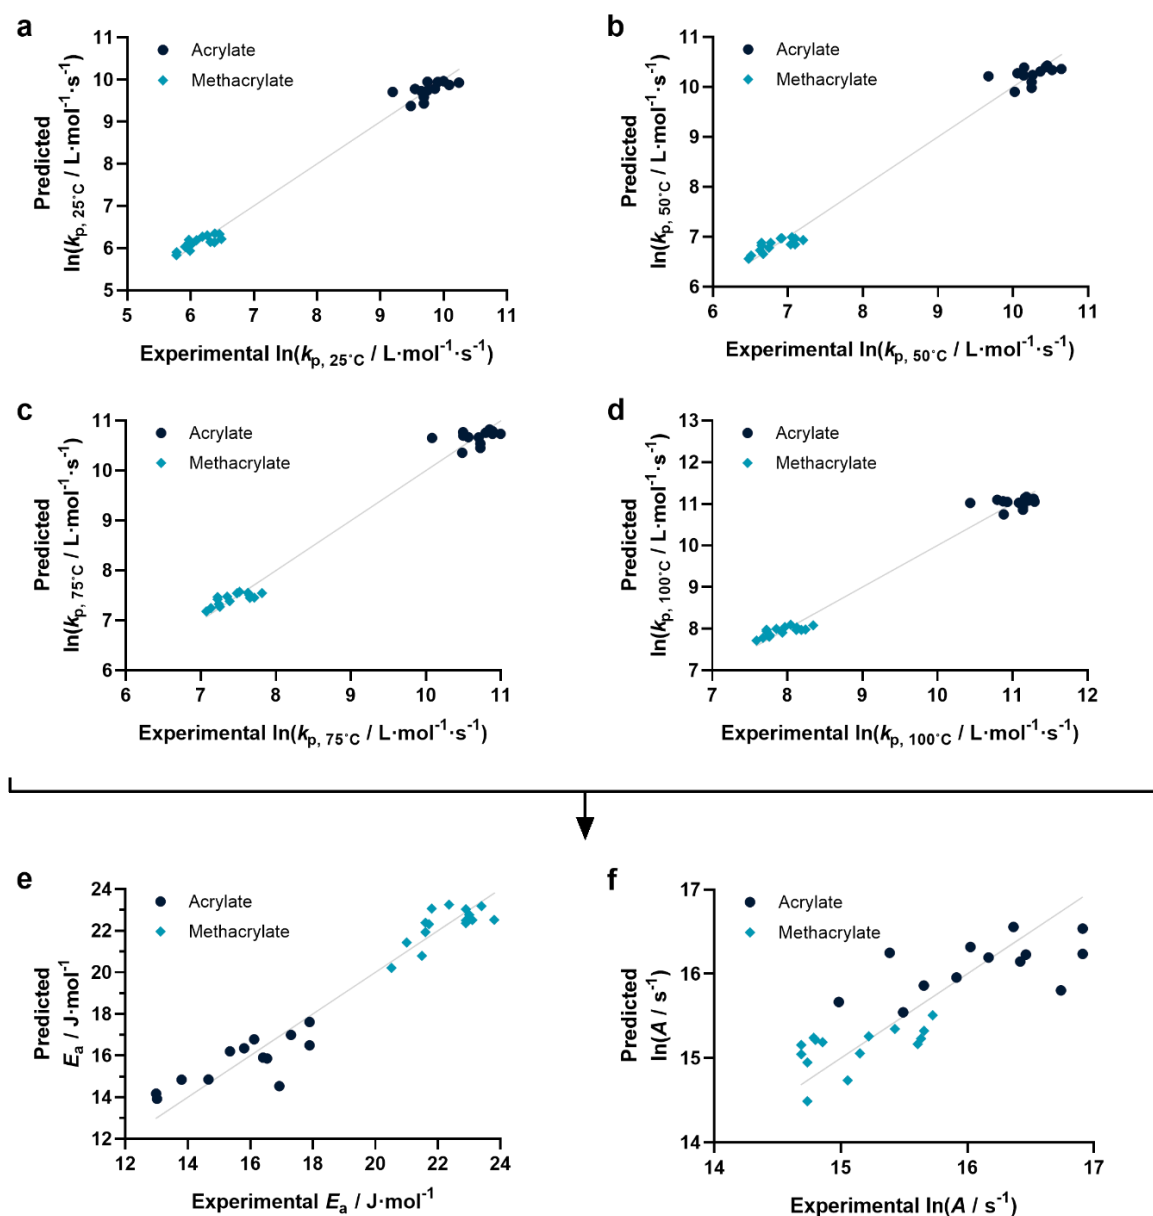

Figure 10: Correlation plots of the natural logarithm of the predicted propagation rate constant ( $\ln(k_p)$ ) versus the experimental  $\ln(k_p)$  for different temperatures: 25°C, 50°C, 75°C and 100°C for a, b, c and d respectively. The predictions were generated via a cross validated Ridge regression using all acrylates and methacrylates without H-binding monomers ( $n = 28$ ) with the molecular weight and a distinction between the type of monomer (blue = acrylate, teal = methacrylate, grey = H-binding monomers and red = other monomers), inductive effect of the tail group, dipole moment, boiling point, melting point and Gibbs Free Energy as parameters. From the predicted  $\ln(k_p)$  results, a prediction for the activation energy ( $E_a$ ) and the natural logarithm of the pre-exponential factor ( $\ln(A)$ ) was made using the Arrhenius plot and formula. The predictions were plotted against their experimental value (e and f). The metrics of each figure are annotated in the table below.

|                      | Figure a | Figure b | Figure c | Figure d | Figure e | Figure f |
|----------------------|----------|----------|----------|----------|----------|----------|
| RMSE                 | 0.181    | 0.186    | 0.192    | 0.200    | 0.849    | 0.403    |
| R2 Value             | 0.990    | 0.988    | 0.986    | 0.984    | 0.941    | 0.661    |
| Variance Predictions | 3.277    | 2.915    | 2.621    | 2.376    | 12.065   | 0.320    |
| Variance Residuals   | 0.034    | 0.036    | 0.038    | 0.042    | 0.748    | 0.169    |

All  $\ln(K_p)$  data [Molecular weight, a\_value, R\_value, H-bonding (H-donor, H-acceptor)]

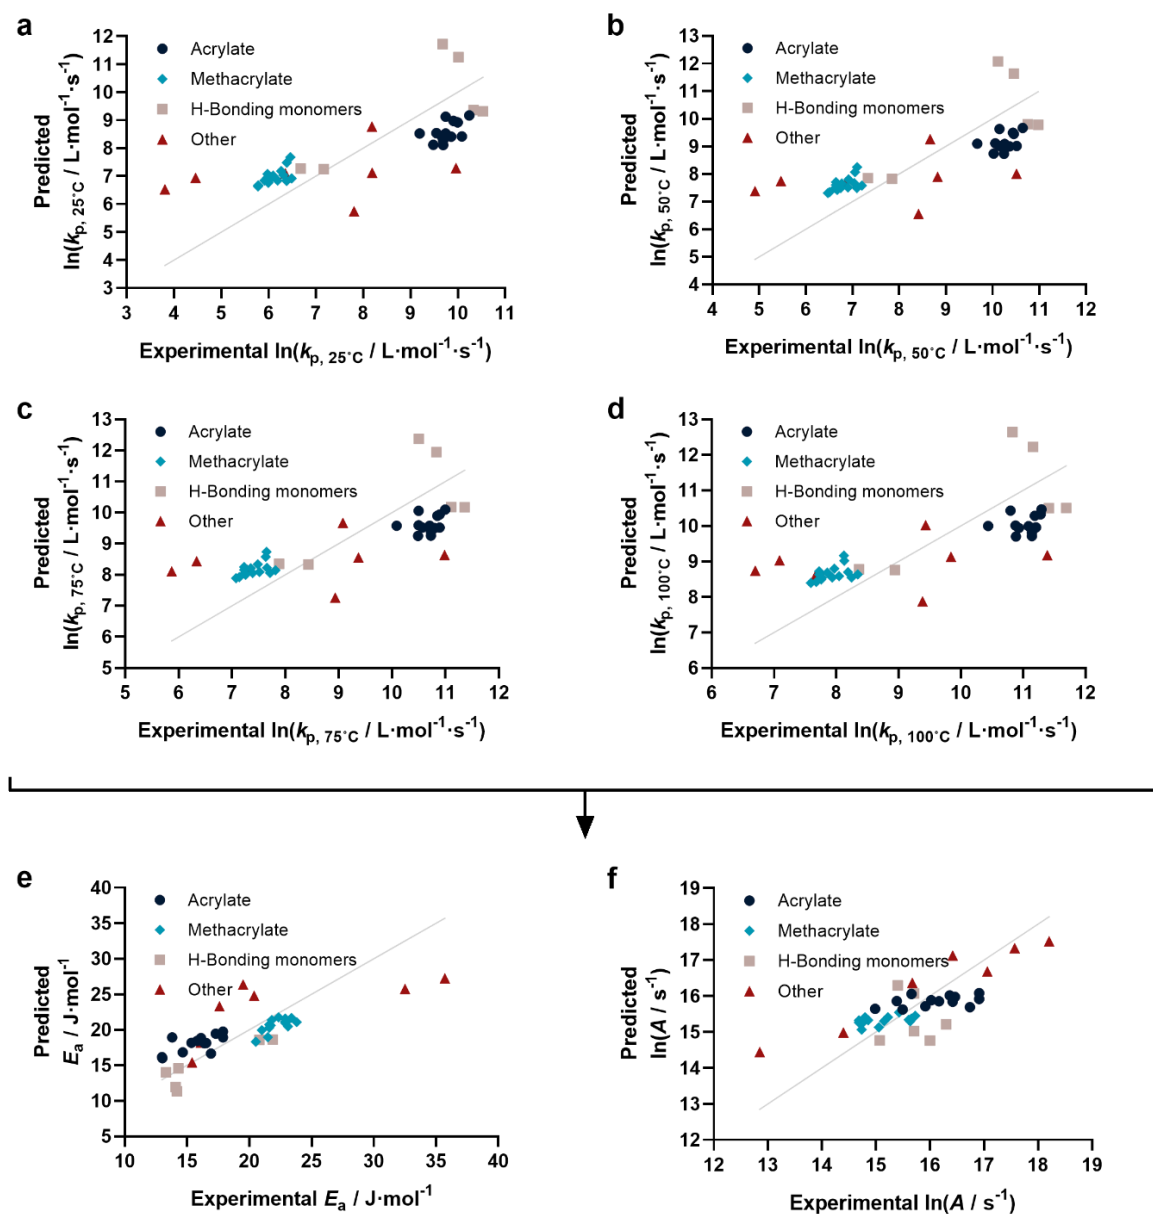

Figure 11: Correlation plots of the natural logarithm of the predicted propagation rate constant ( $\ln(k_p)$ ) versus the experimental  $\ln(k_p)$  for different temperatures: 25°C, 50°C, 75°C and 100°C for a, b, c and d respectively. The predictions were generated via a cross validated Ridge regression using all available data ( $n = 41$ ) with the molecular weight and a distinction between the type of monomer (blue = acrylate, teal = methacrylate, grey = H-binding monomers and red = other monomers), inductive effect of the tail group, the effect of H-donors and H-acceptors as parameters. From the predicted  $\ln(k_p)$  results, a prediction for the activation energy ( $E_a$ ) and the natural logarithm of the pre-exponential factor ( $\ln(A)$ ) was made using the Arrhenius plot and formula. The predictions were plotted against their experimental value (e and f). The metrics of each figure are annotated in the table below.

|                      | Figure a | Figure b | Figure c | Figure d | Figure e | Figure f |
|----------------------|----------|----------|----------|----------|----------|----------|
| RMSE                 | 1.272    | 1.189    | 1.120    | 1.061    | 3.053    | 0.617    |
| R2 Value             | 0.561    | 0.559    | 0.557    | 0.555    | 0.593    | 0.574    |
| Variance Predictions | 1.509    | 1.287    | 1.126    | 0.994    | 11.659   | 0.434    |
| Variance Residuals   | 1.658    | 1.449    | 1.285    | 1.154    | 9.554    | 0.391    |

All  $\ln(k_p)$  data [Molecular weight,  $a\_value$ ,  $R\_value$ , Chemdraw parameters, H-bonding parameters]

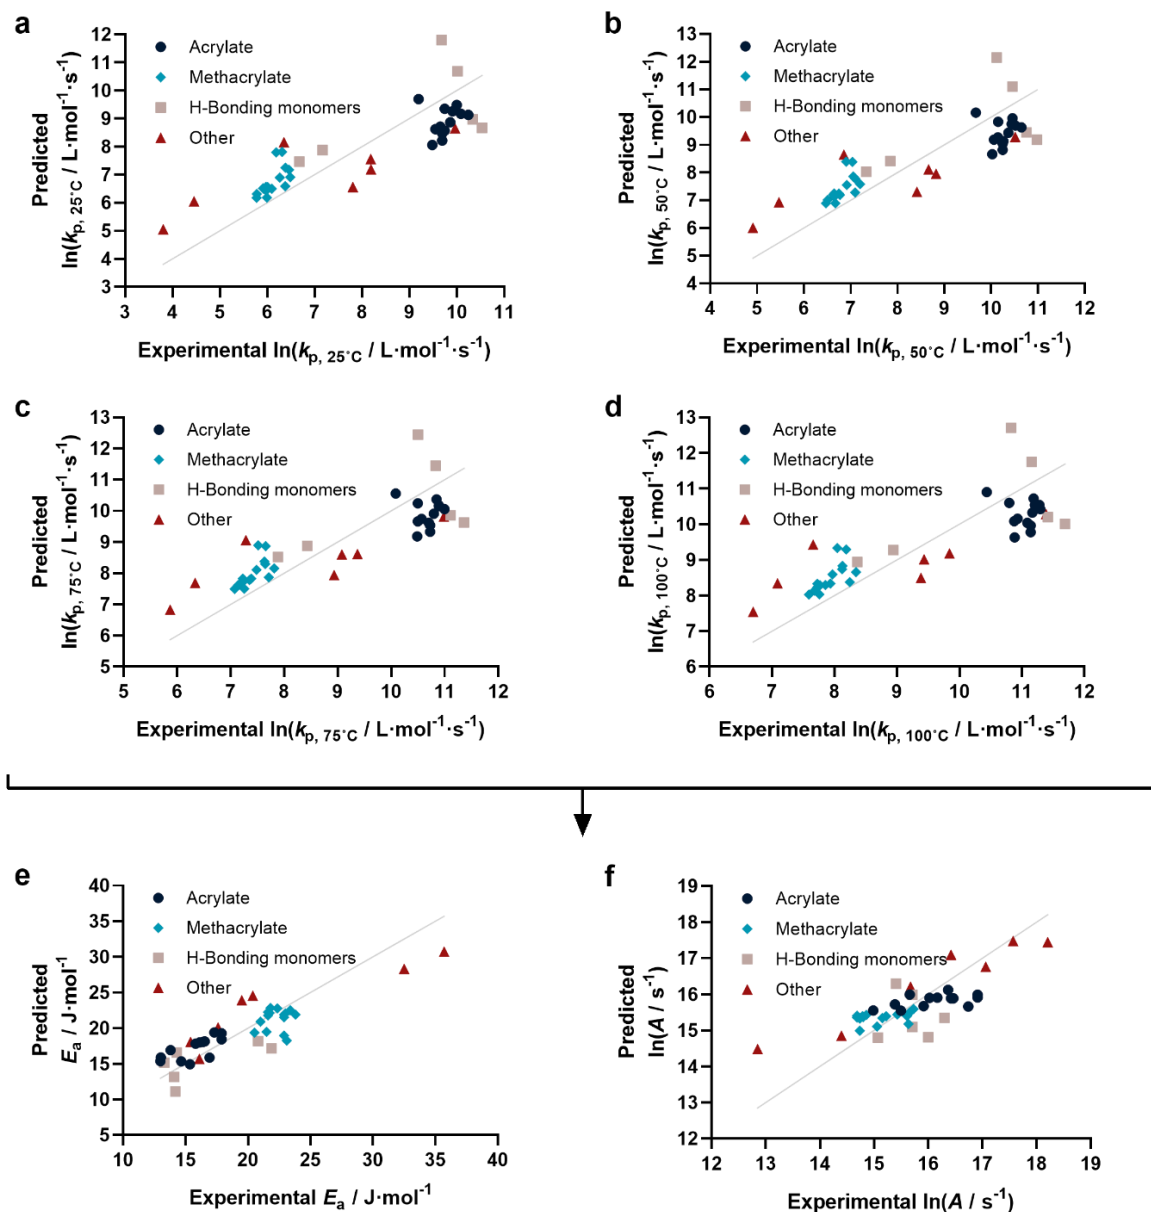

Figure 12: Correlation plots of the natural logarithm of the predicted propagation rate constant ( $\ln(k_p)$ ) versus the experimental  $\ln(k_p)$  for different temperatures: 25°C, 50°C, 75°C and 100°C for a, b, c and d respectively. The predictions were generated via a cross validated Ridge regression using all available data ( $n = 41$ ) with the molecular weight and a distinction between the type of monomer (blue = acrylate, teal = methacrylate, grey = H-binding monomers and red = other monomers), inductive effect of the tail group, dipole moment, boiling point, melting point, Gibbs Free Energy, the effect of H-donors and H-acceptors as parameters. From the predicted  $\ln(k_p)$  results, a prediction for the activation energy ( $E_a$ ) and the natural logarithm of the pre-exponential factor ( $\ln(A)$ ) was made using the Arrhenius plot and formula. The predictions were plotted against their experimental value (e and f). The metrics of each figure are annotated in the table below.

|                             | Figure a | Figure b | Figure c | Figure d | Figure e | Figure f |
|-----------------------------|----------|----------|----------|----------|----------|----------|
| <b>RMSE</b>                 | 1.048    | 0.986    | 0.936    | 0.893    | 2.421    | 0.606    |
| <b>R2 Value</b>             | 0.703    | 0.697    | 0.691    | 0.685    | 0.744    | 0.590    |
| <b>Variance Predictions</b> | 1.901    | 1.622    | 1.402    | 1.230    | 14.638   | 0.426    |
| <b>Variance Residuals</b>   | 1.125    | 0.998    | 0.898    | 0.818    | 6.006    | 0.377    |

All  $\ln(k_p)$  data [Molecular weight,  $a\_value$ ,  $R\_value$ , Dissociation constants ( $A1^*$  and  $A2^*$ )]

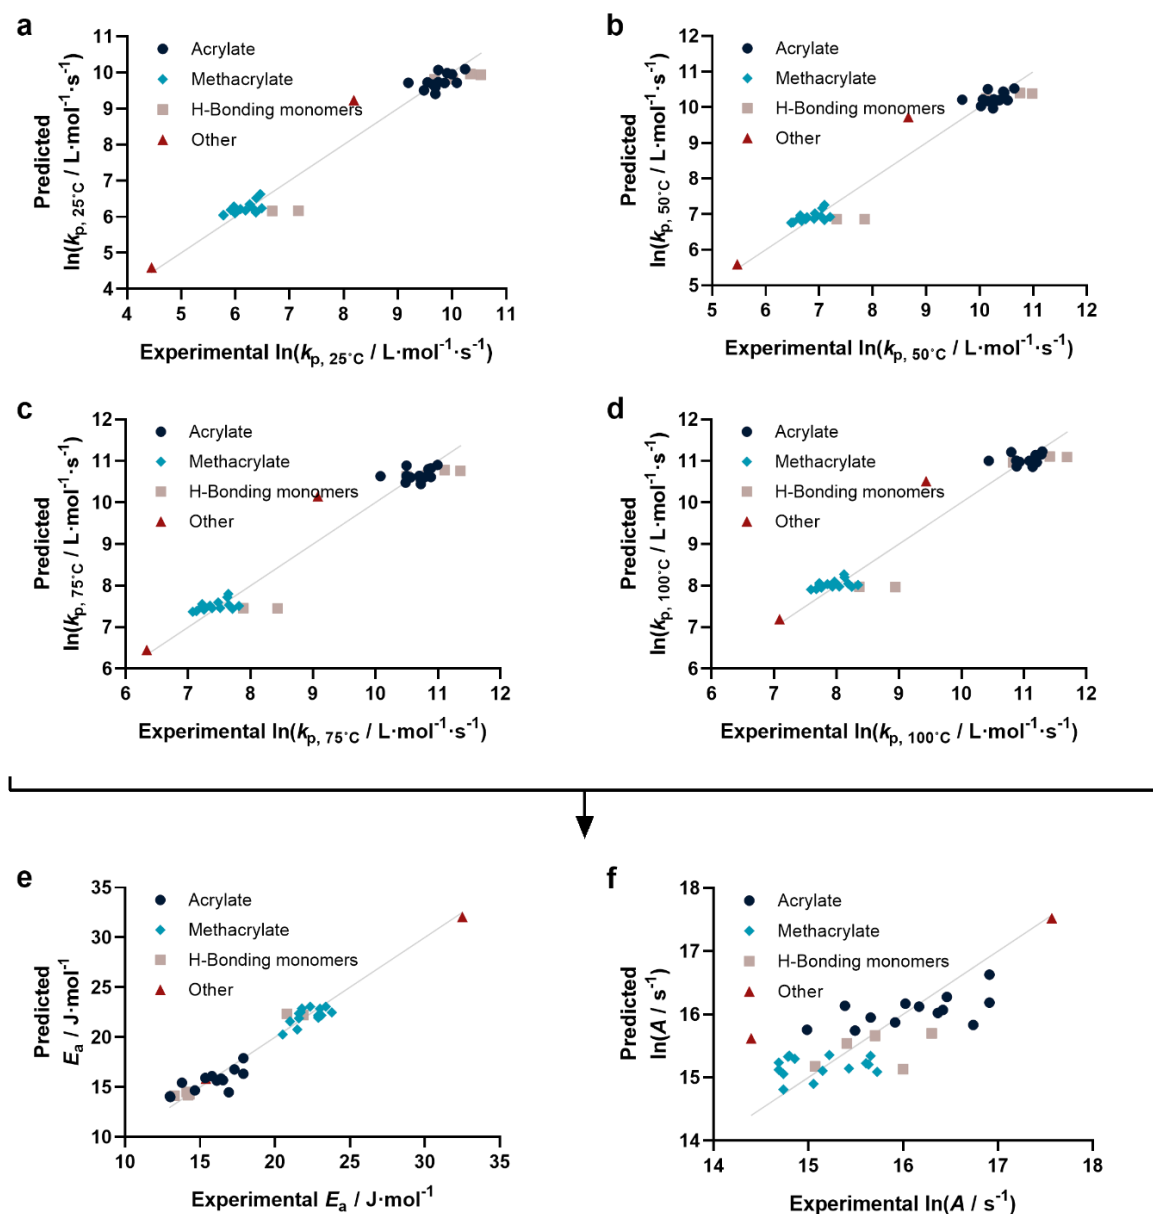

Figure 13: Correlation plots of the natural logarithm of the predicted propagation rate constant ( $\ln(k_p)$ ) versus the experimental  $\ln(k_p)$  for different temperatures: 25°C, 50°C, 75°C and 100°C for a, b, c and d respectively. The predictions were generated via a cross validated Ridge regression using all available data ( $n = 36$ ) with the molecular weight and a distinction between the type of monomer (blue = acrylate, teal = methacrylate, grey = H-binding monomers and red = other monomers), inductive effect of the tail group and the dissociation constants as parameters. From the predicted  $\ln(k_p)$  results, a prediction for the activation energy ( $E_a$ ) and the natural logarithm of the pre-exponential factor ( $\ln(A)$ ) was made using the Arrhenius plot and formula. The predictions were plotted against their experimental value (e and f). The metrics of each figure are annotated in the table below.

|                      | Figure a | Figure b | Figure c | Figure d | Figure e | Figure f |
|----------------------|----------|----------|----------|----------|----------|----------|
| RMSE                 | 0.343    | 0.341    | 0.342    | 0.344    | 0.874    | 0.472    |
| R2 Value             | 0.967    | 0.963    | 0.957    | 0.952    | 0.958    | 0.595    |
| Variance Predictions | 3.383    | 2.947    | 2.599    | 2.318    | 17.495   | 0.305    |
| Variance Residuals   | 0.121    | 0.120    | 0.121    | 0.122    | 0.786    | 0.229    |

All  $\ln(k_p)$  data [Molecular weight,  $a_{\text{value}}$ ,  $R_{\text{value}}$ , H-bonding parameters, Dissociation constants]

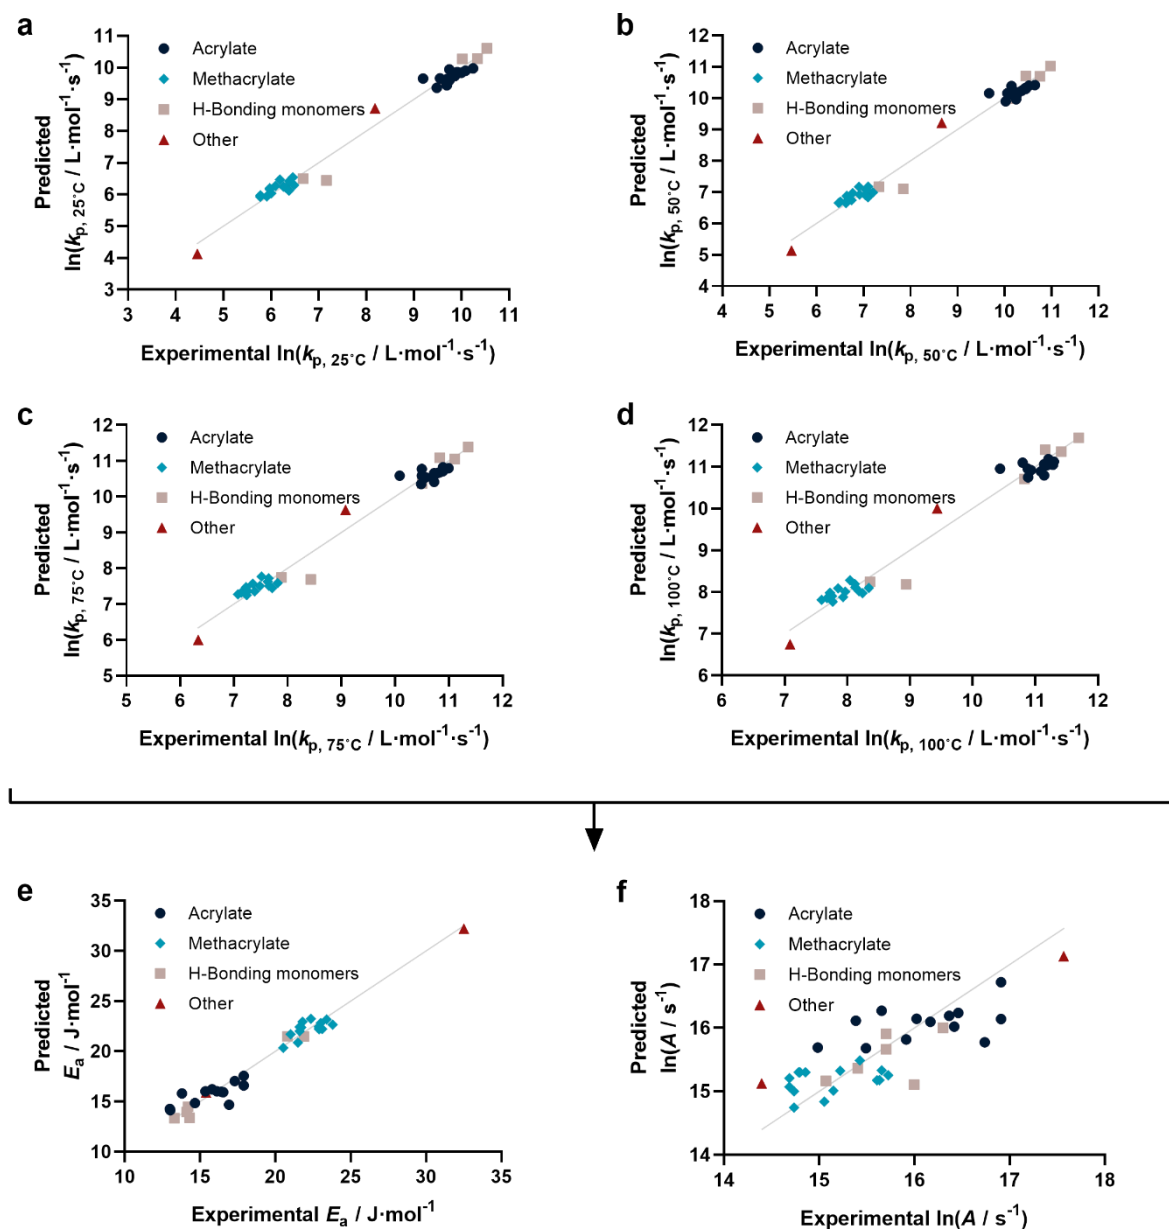

Figure 14: Correlation plots of the natural logarithm of the predicted propagation rate constant ( $\ln(k_p)$ ) versus the experimental  $\ln(k_p)$  for different temperatures: 25°C, 50°C, 75°C and 100°C for a, b, c and d respectively. The predictions were generated via a cross validated Ridge regression using all available data ( $n = 36$ ) with the molecular weight and a distinction between the type of monomer (blue = acrylate, teal = methacrylate, grey = H-binding monomers and red = other monomers), inductive effect of the tail group, the effect of H-donors and H-acceptors, and the dissociation constants as parameters. From the predicted  $\ln(k_p)$  results, a prediction for the activation energy ( $E_a$ ) and the natural logarithm of the pre-exponential factor ( $\ln(A)$ ) was made using the Arrhenius plot and formula. The predictions were plotted against their experimental value (e and f). The metrics of each figure are annotated in the table below.

|                      | Figure a | Figure b | Figure c | Figure d | Figure e | Figure f |
|----------------------|----------|----------|----------|----------|----------|----------|
| RMSE                 | 0.232    | 0.238    | 0.245    | 0.253    | 0.824    | 0.439    |
| R2 Value             | 0.985    | 0.982    | 0.978    | 0.974    | 0.963    | 0.649    |
| Variance Predictions | 3.540    | 3.088    | 2.727    | 2.435    | 17.788   | 0.300    |
| Variance Residuals   | 0.055    | 0.058    | 0.062    | 0.066    | 0.698    | 0.198    |



All  $\ln(k_p)$  data [Molecular weight,  $a_{\text{value}}$ ,  $R_{\text{value}}$ , Chemdraw parameters, H-bonding parameters, Dissociation constants]

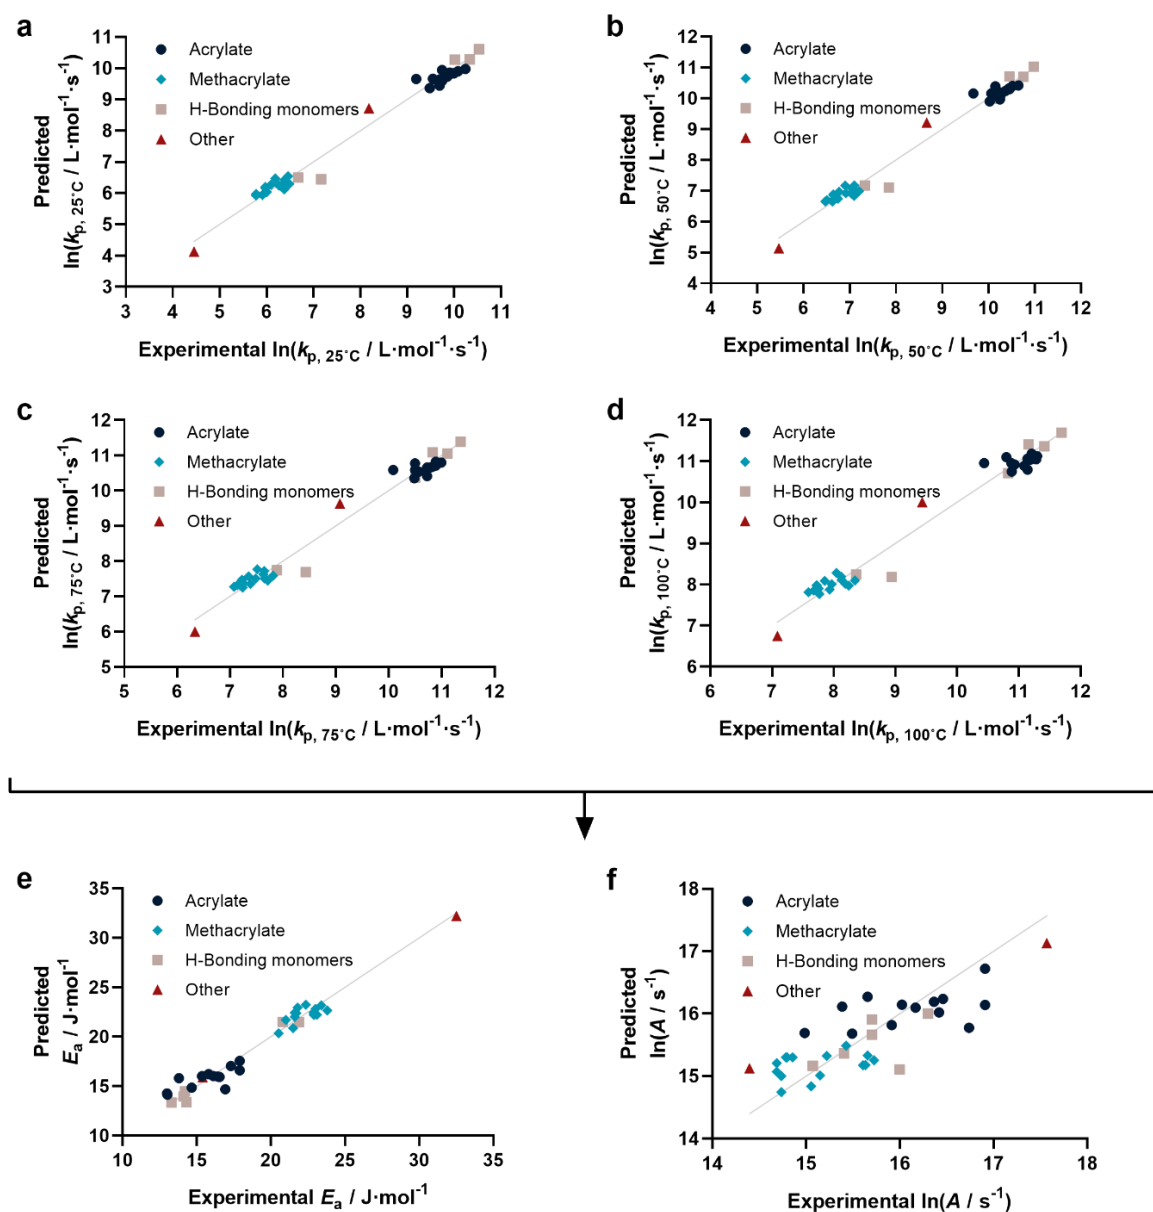

Figure 15: Correlation plots of the natural logarithm of the predicted propagation rate constant ( $\ln(k_p)$ ) versus the experimental  $\ln(k_p)$  for different temperatures: 25°C, 50°C, 75°C and 100°C for a, b, c and d respectively. The predictions were generated via a cross validated Ridge regression using all available data ( $n = 36$ ) with the molecular weight and a distinction between the type of monomer (blue = acrylate, teal = methacrylate, grey = H-binding monomers and red = other monomers), inductive effect of the tail group, dipole moment, boiling point, melting point, Gibbs Free Energy, the effect of H-donors and H-acceptors, and the dissociation constants as parameters. From the predicted  $\ln(k_p)$  results, a prediction for the activation energy ( $E_a$ ) and the natural logarithm of the pre-exponential factor ( $\ln(A)$ ) was made using the Arrhenius plot and formula. The predictions were plotted against their experimental value (e and f). The metrics of each figure are annotated in the table below.

|                      | Figure a | Figure b | Figure c | Figure d | Figure e | Figure f |
|----------------------|----------|----------|----------|----------|----------|----------|
| RMSE                 | 0.172    | 0.178    | 0.185    | 0.193    | 0.792    | 0.386    |
| R2 Value             | 0.992    | 0.990    | 0.988    | 0.985    | 0.965    | 0.729    |
| Variance Predictions | 3.497    | 3.057    | 2.706    | 2.421    | 17.734   | 0.398    |
| Variance Residuals   | 0.031    | 0.032    | 0.035    | 0.038    | 0.645    | 0.153    |

All  $\ln(k_p)$  data [Molecular weight,  $a_{\text{value}}$ ,  $R_{\text{value}}$ , H-bonding parameters, Dissociation constants, Chemspider parameters (predicted boiling point, refractive index and density)]

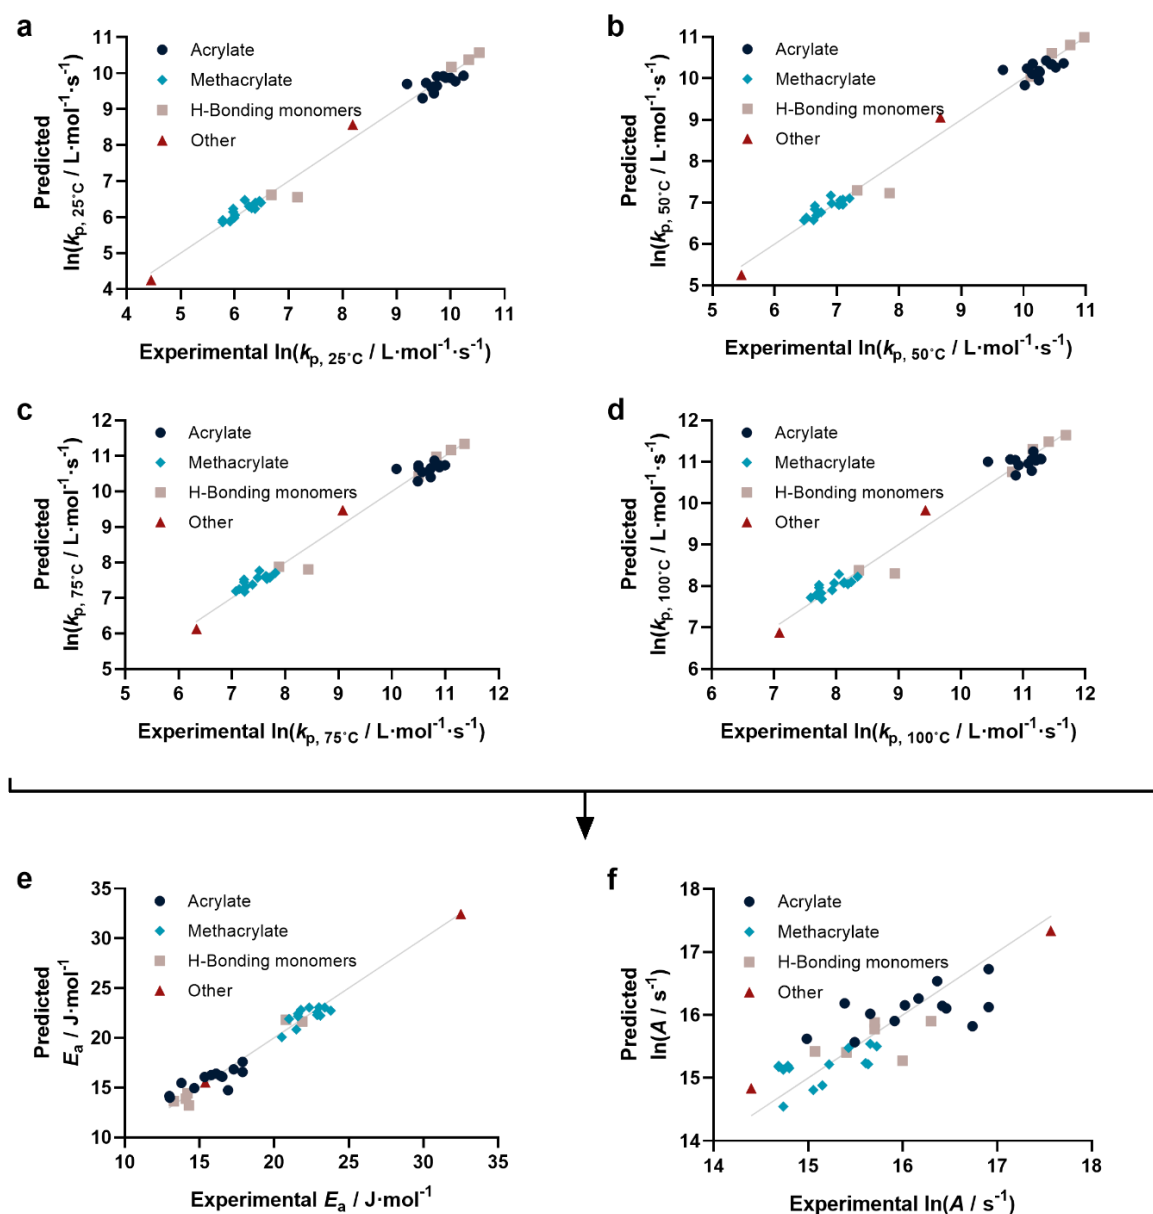

Figure 16: Correlation plots of the natural logarithm of the predicted propagation rate constant ( $\ln(k_p)$ ) versus the experimental  $\ln(k_p)$  for different temperatures: 25°C, 50°C, 75°C and 100°C for a, b, c and d respectively. The predictions were generated via a cross validated Ridge regression using all available data ( $n = 35$ ) with the molecular weight and a distinction between the type of monomer (blue = acrylate, teal = methacrylate, grey = H-binding monomers and red = other monomers), inductive effect of the tail group, the effect of H-donors and H-acceptors, the dissociation constants as parameters, predicted boiling point, predicted refractive index and predicted density as parameters. From the predicted  $\ln(k_p)$  results, a prediction for the activation energy ( $E_a$ ) and the natural logarithm of the pre-exponential factor ( $\ln(A)$ ) was made using the Arrhenius plot and formula. The predictions were plotted against their experimental value (e and f). The metrics of each figure are annotated in the table below.

|                      | Figure a | Figure b | Figure c | Figure d | Figure e | Figure f |
|----------------------|----------|----------|----------|----------|----------|----------|
| RMSE                 | 0.207    | 0.210    | 0.216    | 0.222    | 0.907    | 0.429    |
| R2 Value             | 0.987    | 0.986    | 0.983    | 0.980    | 0.933    | 0.618    |
| Variance Predictions | 3.532    | 3.079    | 2.718    | 2.426    | 12.206   | 0.284    |
| Variance Residuals   | 0.044    | 0.045    | 0.048    | 0.051    | 0.853    | 0.190    |

All available  $\ln(k_p)$  data [Molecular weight,  $a_{\text{value}}$ ,  $R_{\text{value}}$ , H-bonding parameters, Dissociation constants, Chempspider parameters (experimental boiling point, refractive index and density)]

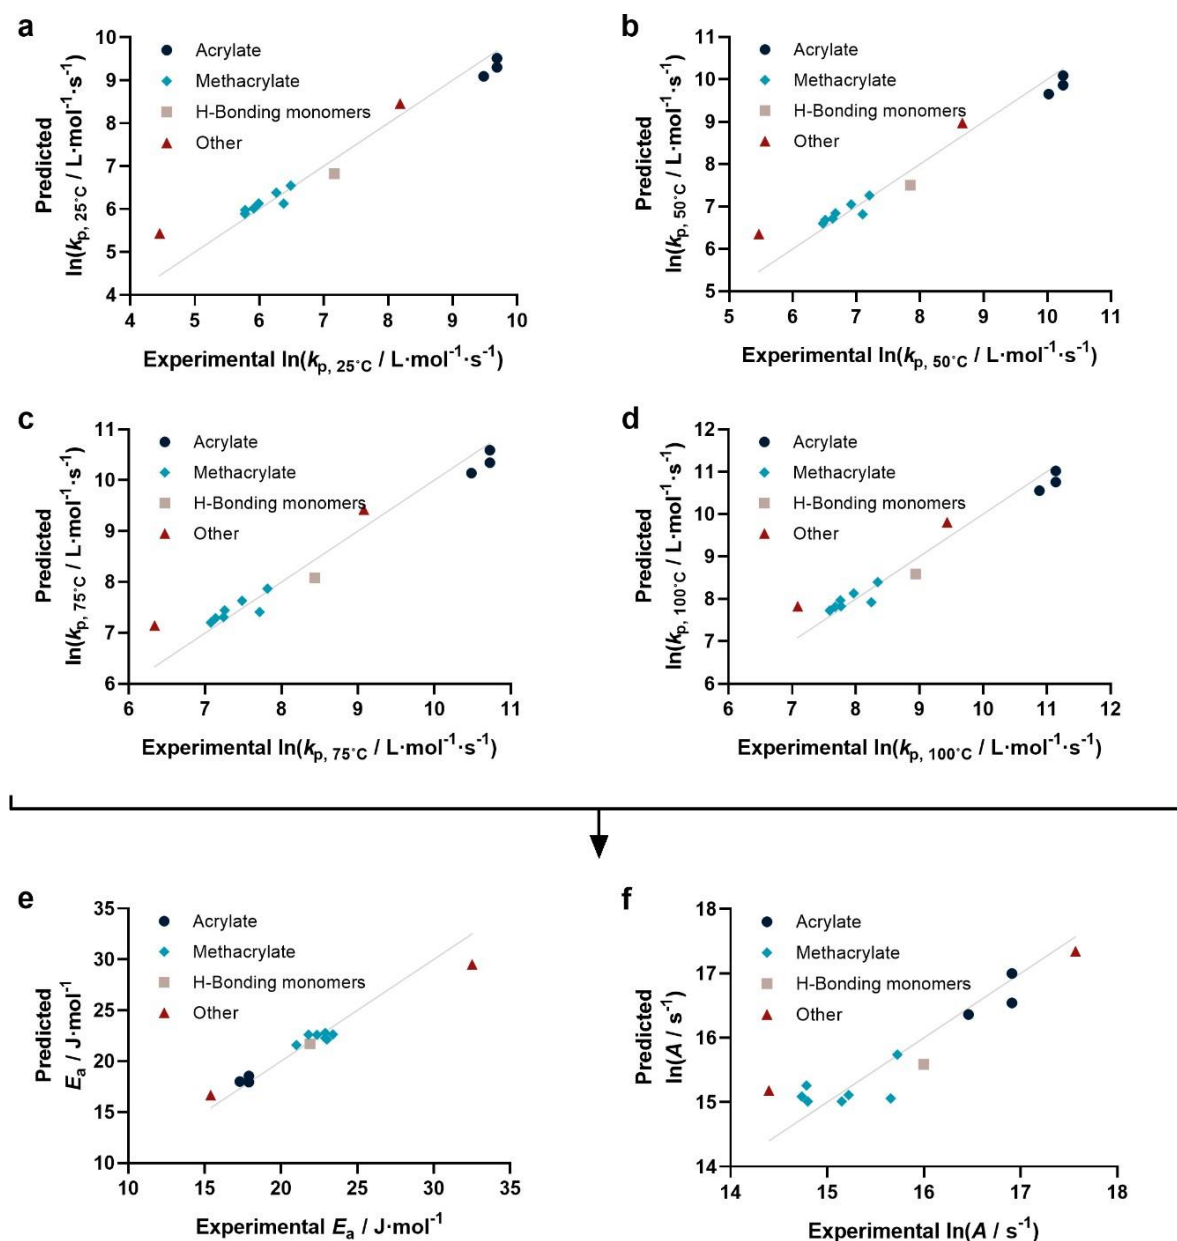

Figure 17: Correlation plots of the natural logarithm of the predicted propagation rate constant ( $\ln(k_p)$ ) versus the experimental  $\ln(k_p)$  for different temperatures: 25°C, 50°C, 75°C and 100°C for a, b, c and d respectively. The predictions were generated via a cross validated Ridge regression using all available data ( $n = 13$ ) with the molecular weight and a distinction between the type of monomer (blue = acrylate, teal = methacrylate, grey = H-binding monomers and red = other monomers), inductive effect of the tail group, the effect of H-donors and H-acceptors, the dissociation constants, experimental boiling point, experimental refractive index and experimental density as parameters. From the predicted  $\ln(k_p)$  results, a prediction for the activation energy ( $E_a$ ) and the natural logarithm of the pre-exponential factor ( $\ln(A)$ ) was made using the Arrhenius plot and formula. The predictions were plotted against their experimental value (e and f). The metrics of each figure are annotated in the table below.

|                      | Figure a | Figure b | Figure c | Figure d | Figure e | Figure f |
|----------------------|----------|----------|----------|----------|----------|----------|
| RMSE                 | 0.355    | 0.339    | 0.325    | 0.316    | 1.050    | 0.369    |
| R2 Value             | 0.953    | 0.951    | 0.950    | 0.948    | 0.933    | 0.851    |
| Variance Predictions | 1.991    | 1.769    | 1.600    | 1.459    | 10.617   | 0.673    |
| Variance Residuals   | 0.136    | 0.123    | 0.114    | 0.107    | 1.186    | 0.148    |

All available  $\ln(k_p)$  data [Molecular weight,  $a_{\text{value}}$ ,  $R_{\text{value}}$ , H-bonding parameters, Dissociation constants, ChempSpider parameters (ACDlogP)]

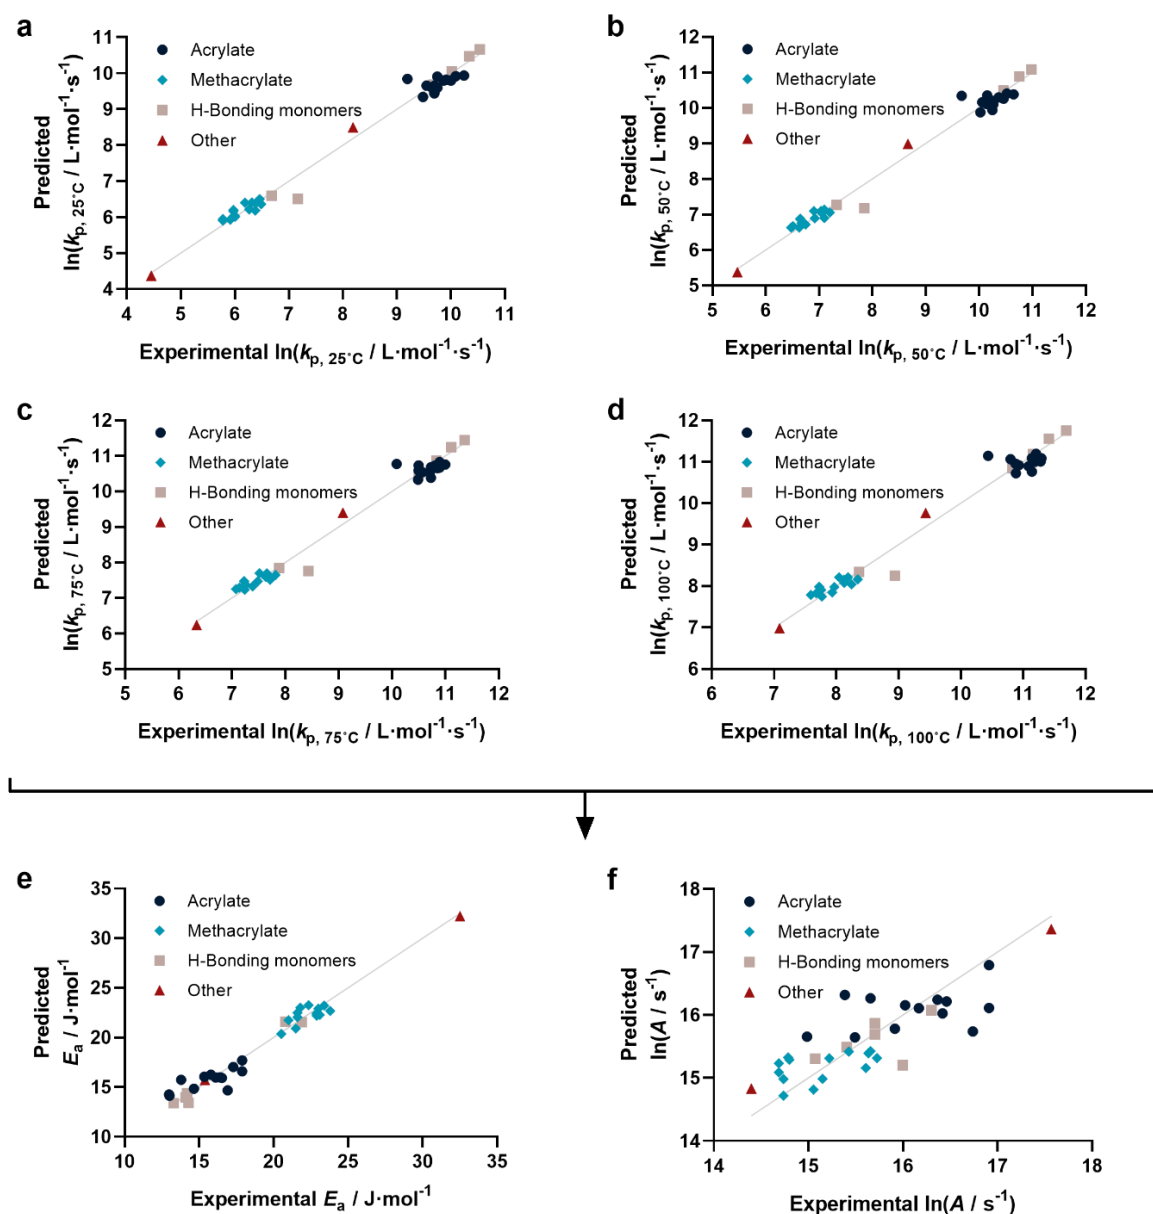

Figure 18: Correlation plots of the natural logarithm of the predicted propagation rate constant ( $\ln(k_p)$ ) versus the experimental  $\ln(k_p)$  for different temperatures: 25°C, 50°C, 75°C and 100°C for a, b, c and d respectively. The predictions were generated via a cross validated Ridge regression using all available data ( $n = 35$ ) with the molecular weight and a distinction between the type of monomer (blue = acrylate, teal = methacrylate, grey = H-binding monomers and red = other monomers), inductive effect of the tail group, the effect of H-donors and H-acceptors, the dissociation constants and ACDlogP as parameters. From the predicted  $\ln(k_p)$  results, a prediction for the activation energy ( $E_a$ ) and the natural logarithm of the pre-exponential factor ( $\ln(A)$ ) was made using the Arrhenius plot and formula. The predictions were plotted against their experimental value (e and f). The metrics of each figure are annotated in the table below.

|                      | Figure a | Figure b | Figure c | Figure d | Figure e | Figure f |
|----------------------|----------|----------|----------|----------|----------|----------|
| RMSE                 | 0.212    | 0.218    | 0.225    | 0.233    | 0.823    | 0.423    |
| R2 Value             | 0.987    | 0.985    | 0.982    | 0.978    | 0.963    | 0.674    |
| Variance Predictions | 3.512    | 3.062    | 2.704    | 2.413    | 18.061   | 0.343    |
| Variance Residuals   | 0.046    | 0.049    | 0.052    | 0.056    | 0.698    | 0.184    |

All available  $\ln(k_p)$  data [Molecular weight,  $a_{\text{value}}$ ,  $R_{\text{value}}$ , H-bonding parameters, Dissociation constants, ChempSpider parameters (Polarizability)]

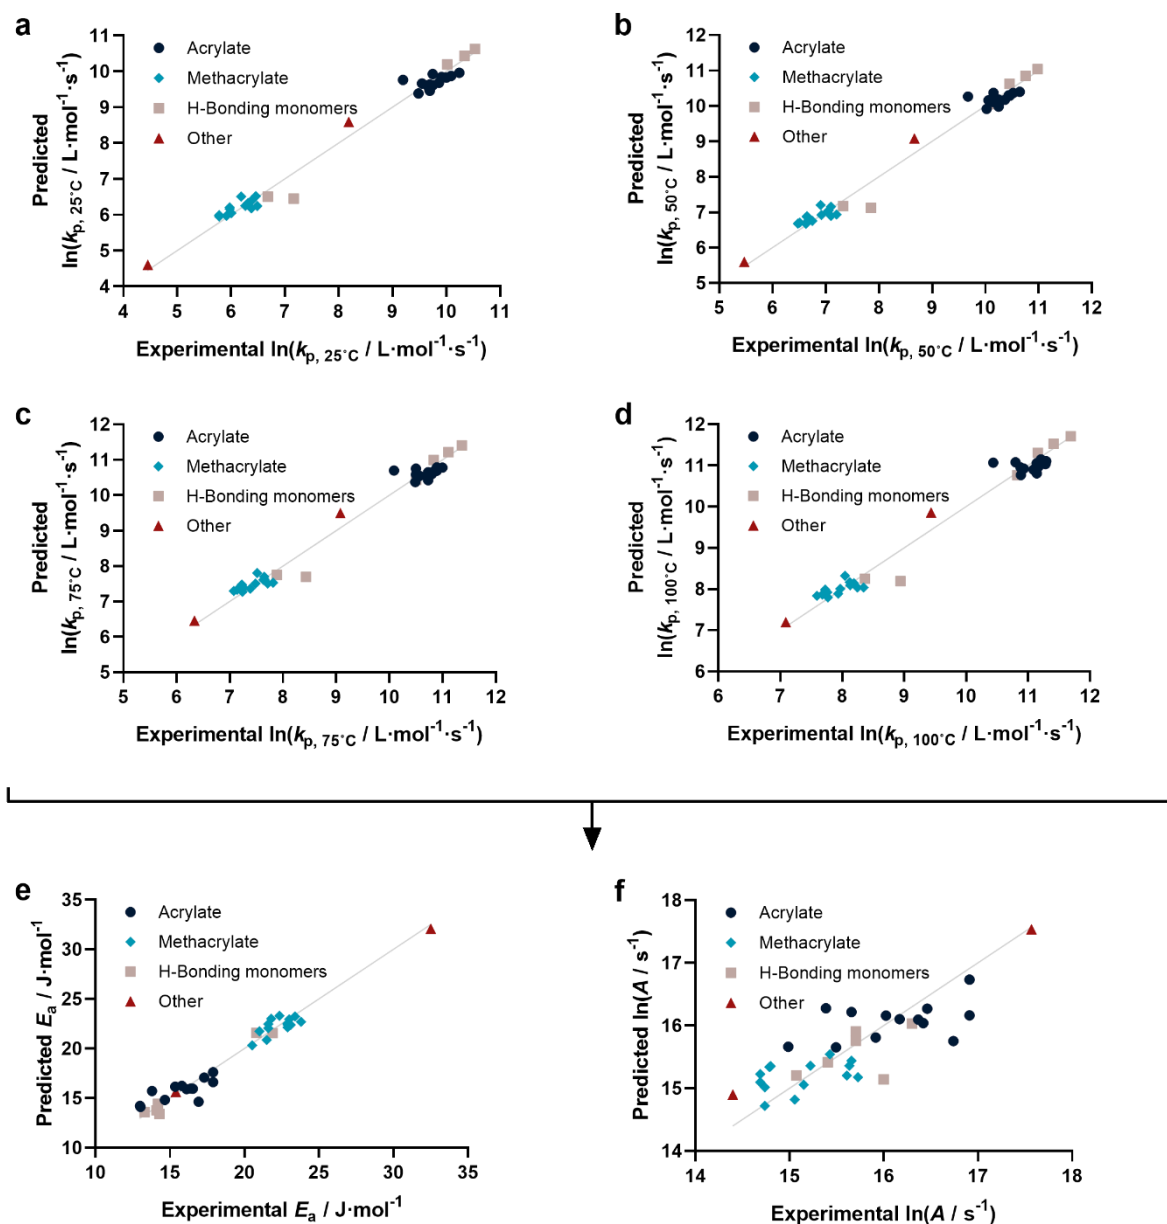

Figure 19: Correlation plots of the natural logarithm of the predicted propagation rate constant ( $\ln(k_p)$ ) versus the experimental  $\ln(k_p)$  for different temperatures: 25°C, 50°C, 75°C and 100°C for a, b, c and d respectively. The predictions were generated via a cross validated Ridge regression using all available data ( $n = 35$ ) with the molecular weight and a distinction between the type of monomer (blue = acrylate, teal = methacrylate, grey = H-binding monomers and red = other monomers), inductive effect of the tail group, the effect of H-donors and H-acceptors, the dissociation constants and polarizability as parameters. From the predicted  $\ln(k_p)$  results, a prediction for the activation energy ( $E_a$ ) and the natural logarithm of the pre-exponential factor ( $\ln(A)$ ) was made using the Arrhenius plot and formula. The predictions were plotted against their experimental value (e and f). The metrics of each figure are annotated in the table below.

|                      | Figure a | Figure b | Figure c | Figure d | Figure e | Figure f |
|----------------------|----------|----------|----------|----------|----------|----------|
| RMSE                 | 0.227    | 0.232    | 0.238    | 0.245    | 0.823    | 0.427    |
| R2 Value             | 0.985    | 0.983    | 0.979    | 0.976    | 0.963    | 0.666    |
| Variance Predictions | 3.454    | 3.010    | 2.658    | 2.368    | 18.064   | 0.349    |
| Variance Residuals   | 0.053    | 0.055    | 0.058    | 0.062    | 0.701    | 0.188    |

All available  $\ln(k_p)$  data [Molecular weight,  $a_{\text{value}}$ ,  $R_{\text{value}}$ , H-bonding parameters, Dissociation constants, ChempSpider parameters (Surface tension)]

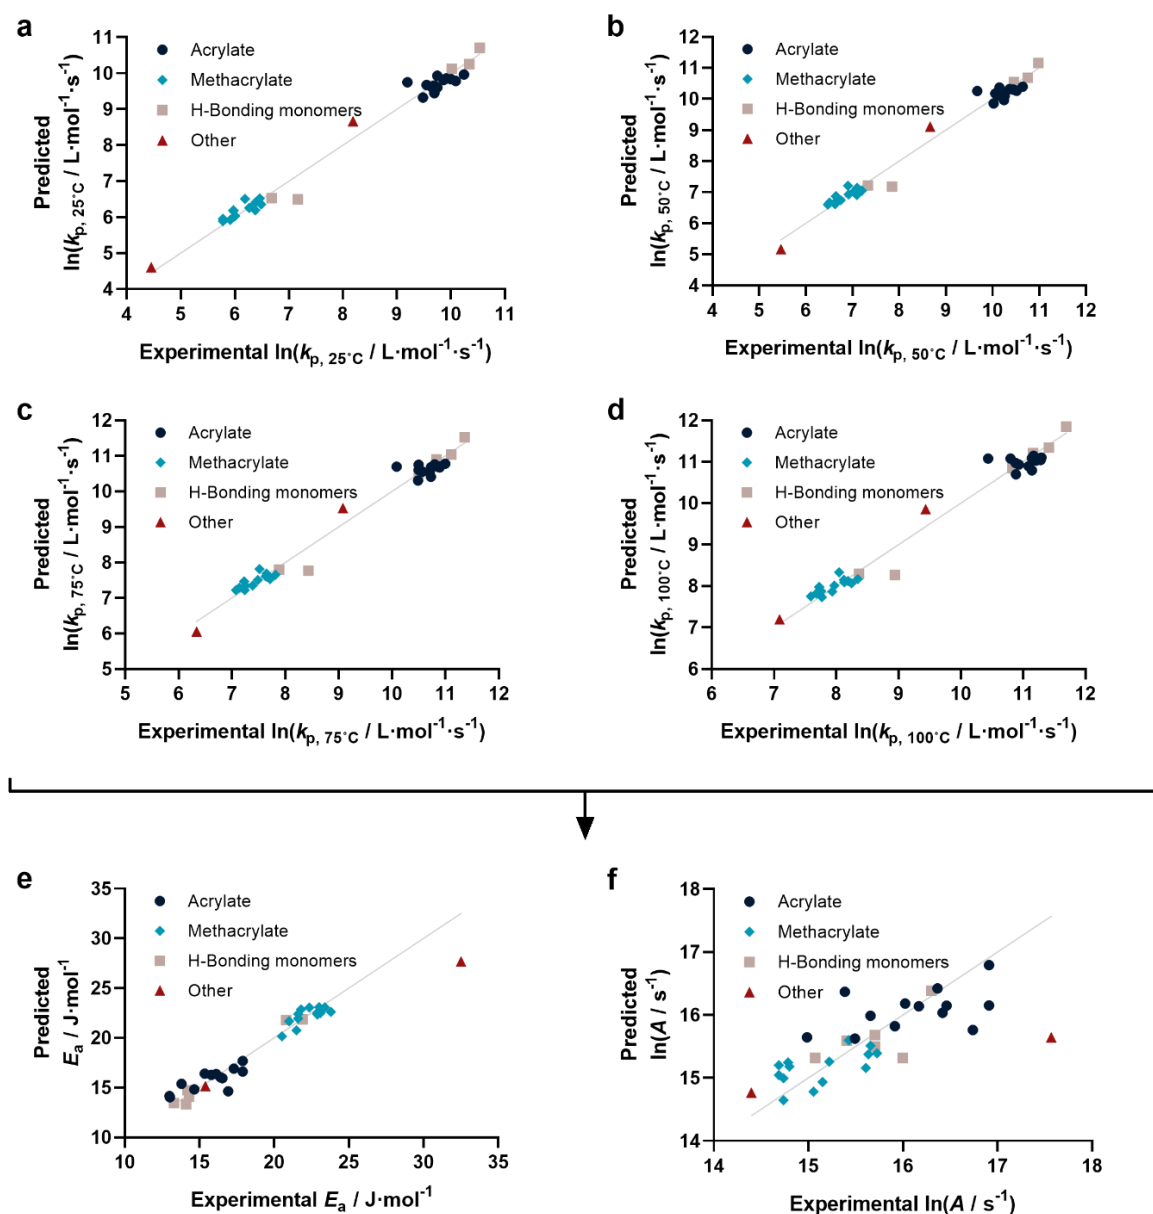

Figure 20: Correlation plots of the natural logarithm of the predicted propagation rate constant ( $\ln(k_p)$ ) versus the experimental  $\ln(k_p)$  for different temperatures: 25°C, 50°C, 75°C and 100°C for a, b, c and d respectively. The predictions were generated via a cross validated Ridge regression using all available data ( $n = 35$ ) with the molecular weight and a distinction between the type of monomer (blue = acrylate, teal = methacrylate, grey = H-binding monomers and red = other monomers), inductive effect of the tail group, the effect of H-donors and H-acceptors, the dissociation constants and surface tension as parameters. From the predicted  $\ln(k_p)$  results, a prediction for the activation energy ( $E_a$ ) and the natural logarithm of the pre-exponential factor ( $\ln(A)$ ) was made using the Arrhenius plot and formula. The predictions were plotted against their experimental value (e and f). The metrics of each figure are annotated in the table below.

|                      | Figure a | Figure b | Figure c | Figure d | Figure e | Figure f |
|----------------------|----------|----------|----------|----------|----------|----------|
| RMSE                 | 0.222    | 0.226    | 0.231    | 0.236    | 1.139    | 0.512    |
| R2 Value             | 0.986    | 0.983    | 0.981    | 0.977    | 0.930    | 0.521    |
| Variance Predictions | 3.450    | 3.090    | 2.725    | 2.430    | 15.167   | 0.276    |
| Variance Residuals   | 0.050    | 0.053    | 0.055    | 0.058    | 1.316    | 0.267    |

All available  $\ln(k_p)$  data [Molecular weight,  $a_{\text{value}}$ ,  $R_{\text{value}}$ , H-bonding parameters, Dissociation constants, ChempSpider parameters (Vapor pressure)]

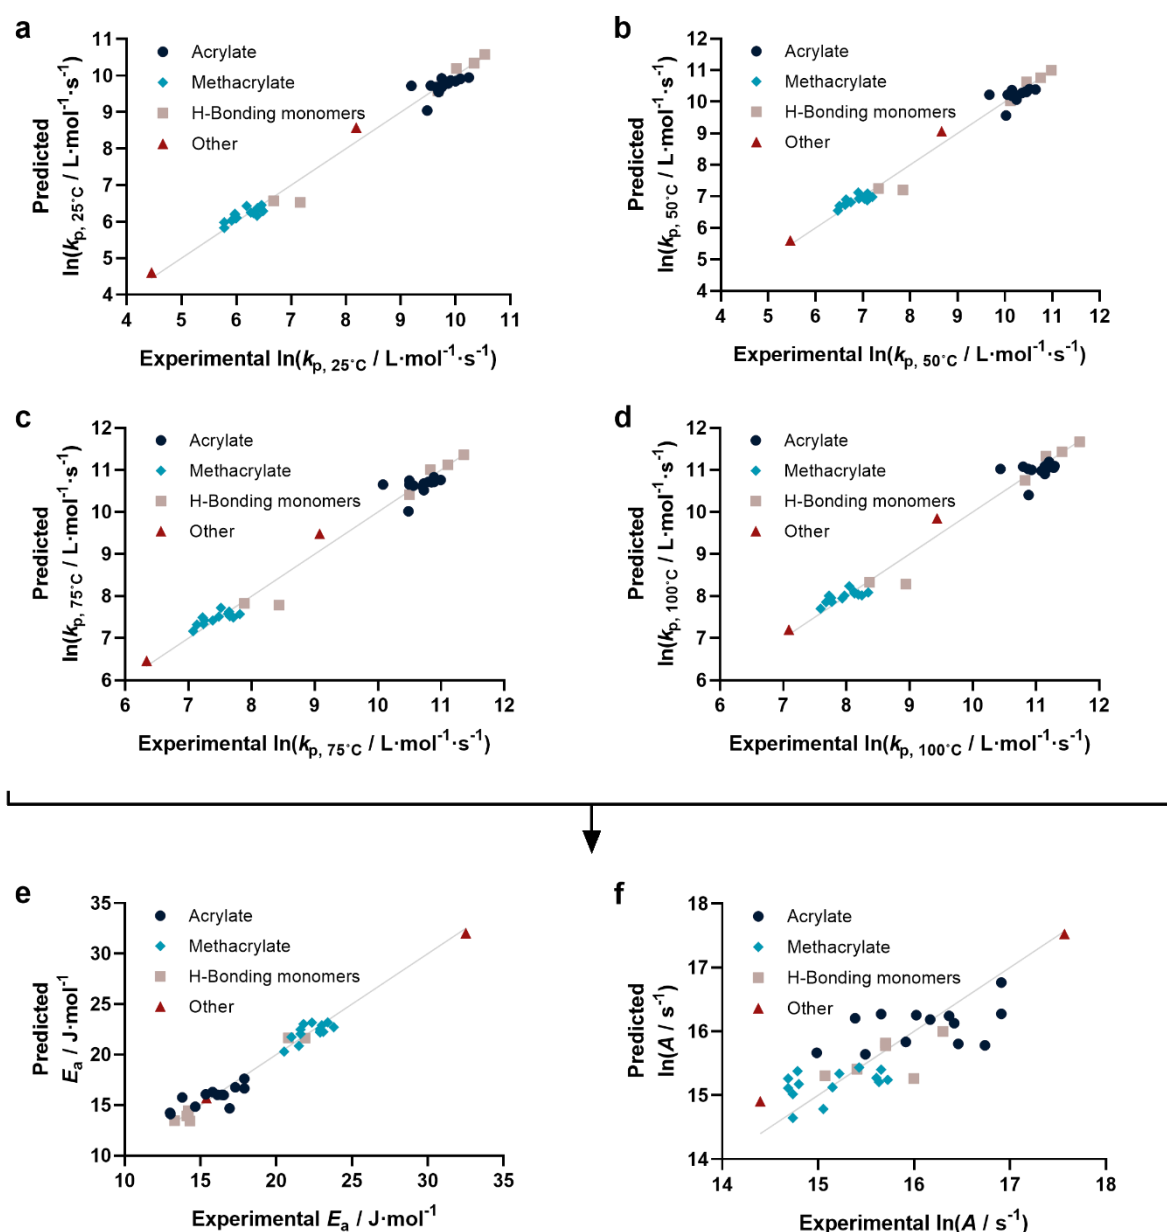

Figure 21: Correlation plots of the natural logarithm of the predicted propagation rate constant ( $\ln(k_p)$ ) versus the experimental  $\ln(k_p)$  for different temperatures: 25°C, 50°C, 75°C and 100°C for a, b, c and d respectively. The predictions were generated via a cross validated Ridge regression using all available data ( $n = 35$ ) with the molecular weight and a distinction between the type of monomer (blue = acrylate, teal = methacrylate, grey = H-binding monomers and red = other monomers), inductive effect of the tail group, the effect of H-donors and H-acceptors, the dissociation constants and vapor pressure as parameters. From the predicted  $\ln(k_p)$  results, a prediction for the activation energy ( $E_a$ ) and the natural logarithm of the pre-exponential factor ( $\ln(A)$ ) was made using the Arrhenius plot and formula. The predictions were plotted against their experimental value (e and f). The metrics of each figure are annotated in the table below.

|                      | Figure a | Figure b | Figure c | Figure d | Figure e | Figure f |
|----------------------|----------|----------|----------|----------|----------|----------|
| RMSE                 | 0.219    | 0.224    | 0.230    | 0.237    | 0.825    | 0.421    |
| R2 Value             | 0.987    | 0.984    | 0.981    | 0.977    | 0.963    | 0.676    |
| Variance Predictions | 3.455    | 3.012    | 2.660    | 2.374    | 17.927   | 0.355    |
| Variance Residuals   | 0.049    | 0.052    | 0.054    | 0.058    | 0.701    | 0.183    |

  

|                      | Figure a | Figure b | Figure c | Figure d | Figure e | Figure f |
|----------------------|----------|----------|----------|----------|----------|----------|
| RMSE                 | 0.062    | 0.064    | 0.061    | 0.062    | 0.527    | 0.320    |
| R2 Value             | 0.999    | 0.998    | 0.998    | 0.998    | 0.983    | 0.888    |
| Variance Predictions | 2.605    | 2.286    | 2.045    | 1.854    | 16.162   | 0.674    |
| Variance Residuals   | 0.004    | 0.004    | 0.004    | 0.004    | 0.299    | 0.109    |

All available  $\ln(k_p)$  data [Molecular weight,  $a_{\text{value}}$ ,  $R_{\text{value}}$ , H-bonding parameters, Dissociation constants, ChempSpider parameters (Polarizability)]; using a weight of 0.5 for selected data

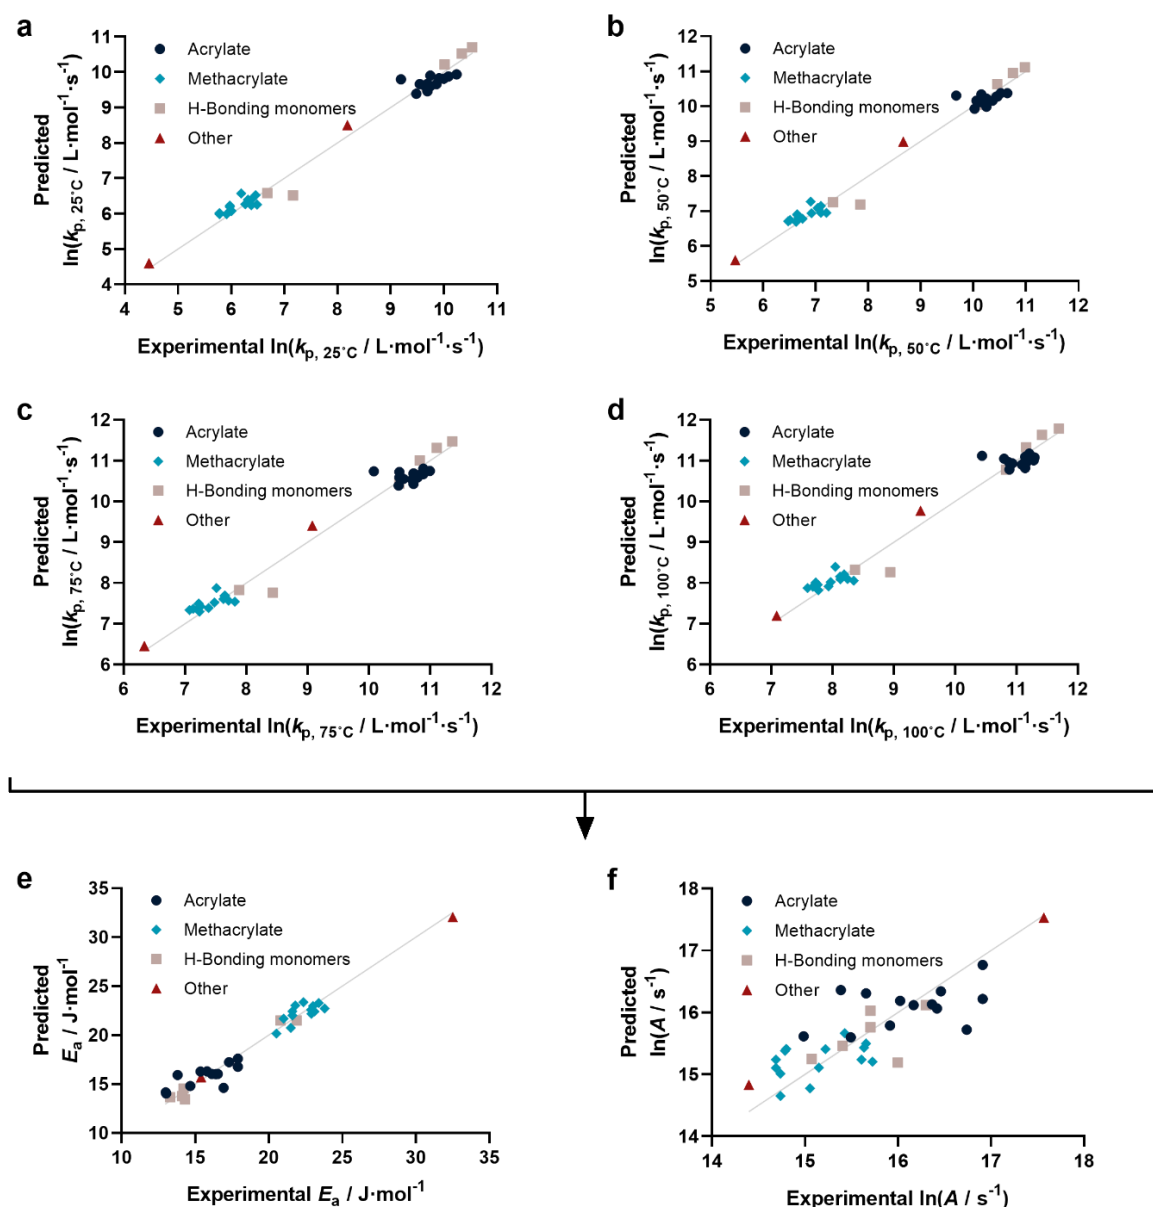

Figure 22: Correlation plots of the natural logarithm of the predicted propagation rate constant ( $\ln(k_p)$ ) versus the experimental  $\ln(k_p)$  for different temperatures: 25°C, 50°C, 75°C and 100°C for a, b, c and d respectively. The predictions were generated via a cross validated Ridge regression using all available data ( $n = 35$ ) with the molecular weight and a distinction between the type of monomer (blue = acrylate, teal = methacrylate, grey = H-binding monomers and red = other monomers), inductive effect of the tail group, the effect of H-donors and H-acceptors, the dissociation constants and polarizability as parameters. A selection of monomers ( $n = 13$ ) is given a weight of 1 while the rest ( $n = 22$ ) has a weight of 0.5. From the predicted  $\ln(k_p)$  results, a prediction for the activation energy ( $E_a$ ) and the natural logarithm of the pre-exponential factor ( $\ln(A)$ ) was made using the Arrhenius plot and formula. The predictions were plotted against their experimental value (e and f). The metrics of each figure are annotated in the table below.

|                      | Figure a | Figure b | Figure c | Figure d | Figure e | Figure f |
|----------------------|----------|----------|----------|----------|----------|----------|
| RMSE                 | 0.228    | 0.233    | 0.240    | 0.247    | 0.832    | 0.432    |
| R2 Value             | 0.985    | 0.983    | 0.979    | 0.975    | 0.963    | 0.660    |
| Variance Predictions | 3.149    | 2.977    | 2.629    | 2.348    | 17.910   | 0.366    |
| Variance Residuals   | 0.053    | 0.055    | 0.058    | 0.062    | 0.713    | 0.191    |



All available  $\ln(k_p)$  data [Molecular weight,  $a_{\text{value}}$ ,  $R_{\text{value}}$ , H-bonding parameters, Dissociation constants, ChempSpider parameters (Polarizability)]; using a weight of 0 for selected data

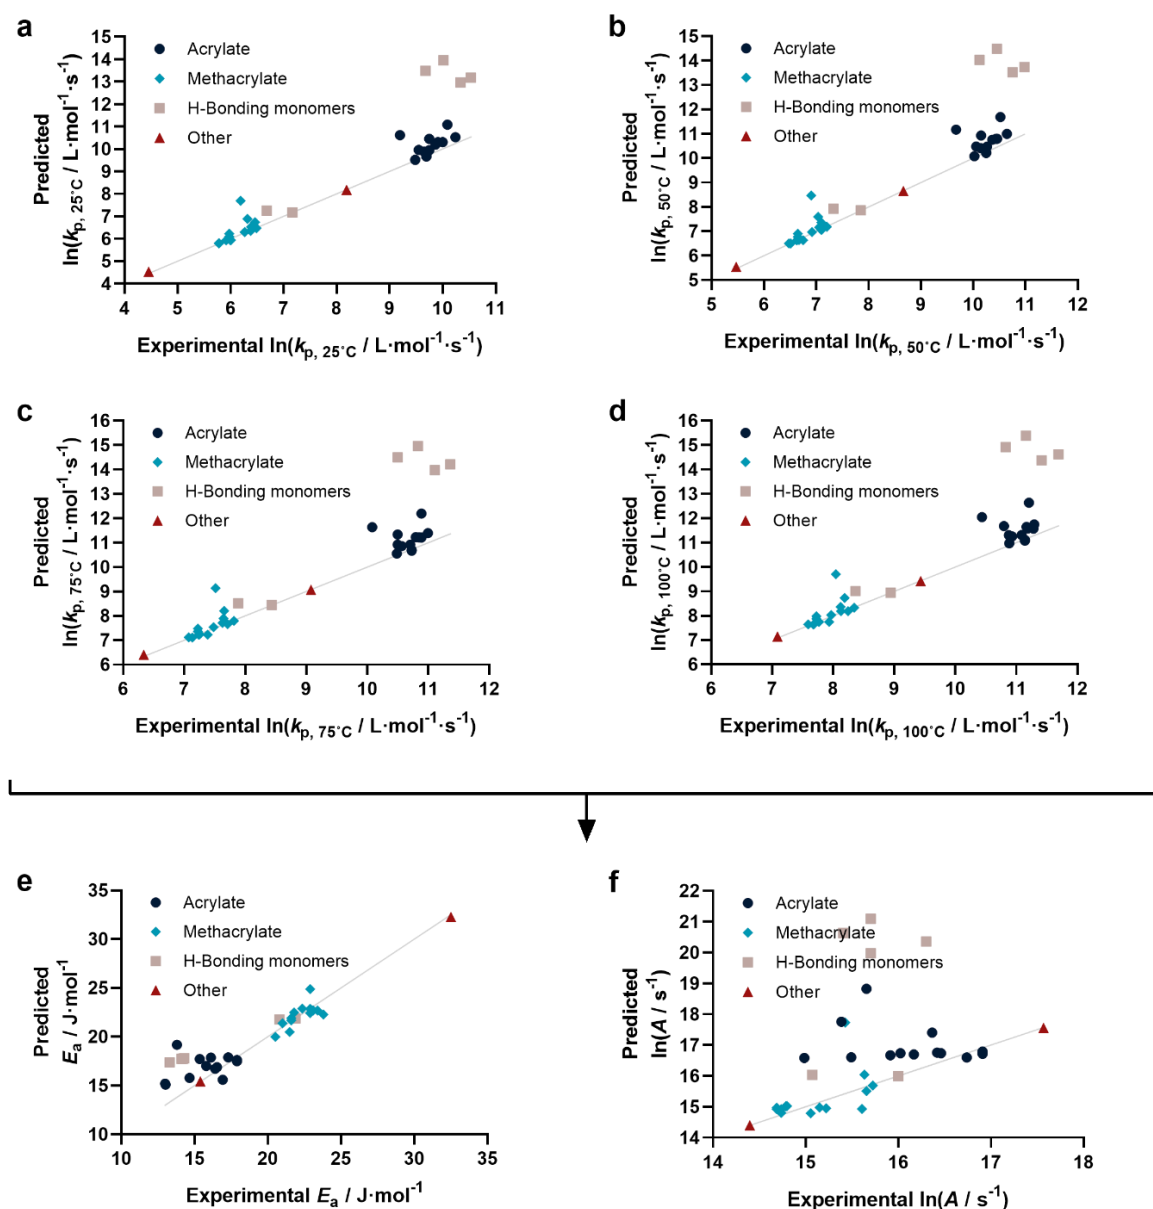

Figure 23: Correlation plots of the natural logarithm of the predicted propagation rate constant ( $\ln(k_p)$ ) versus the experimental  $\ln(k_p)$  for different temperatures: 25°C, 50°C, 75°C and 100°C for a, b, c and d respectively. The predictions were generated via a cross validated Ridge regression using all available data ( $n = 35$ ) with the molecular weight and a distinction between the type of monomer (blue = acrylate, teal = methacrylate, grey = H-binding monomers and red = other monomers), inductive effect of the tail group, the effect of H-donors and H-acceptors, the dissociation constants and polarizability as parameters. A selection of monomers ( $n = 13$ ) is given a weight of 1 while the rest ( $n = 22$ ) has a weight of 0.5. From the predicted  $\ln(k_p)$  results, a prediction for the activation energy ( $E_a$ ) and the natural logarithm of the pre-exponential factor ( $\ln(A)$ ) was made using the Arrhenius plot and formula. The predictions were plotted against their experimental value (e and f). The metrics of each figure are annotated in the table below.

|                             | Figure a | Figure b | Figure c | Figure d | Figure e | Figure f |
|-----------------------------|----------|----------|----------|----------|----------|----------|
| <b>RMSE</b>                 | 1.209    | 1.255    | 1.296    | 1.332    | 1.829    | 1.857    |
| <b>R2 Value</b>             | 0.588    | 0.492    | 0.389    | 0.280    | 0.819    | -5.294   |
| <b>Variance Predictions</b> | 6.356    | 5.959    | 5.637    | 5.374    | 12.590   | 3.149    |
| <b>Variance Residuals</b>   | 1.109    | 1.190    | 1.266    | 1.337    | 2.700    | 2.594    |

Arrhenius plots of four selected monomers, values determined by a cross validated Ridge regression on All available  $\ln(K_p)$  data [Molecular weight,  $a\_value$ ,  $R\_value$ , H-bonding parameters, Dissociation constants, Chemspider parameters (Polarizability)]

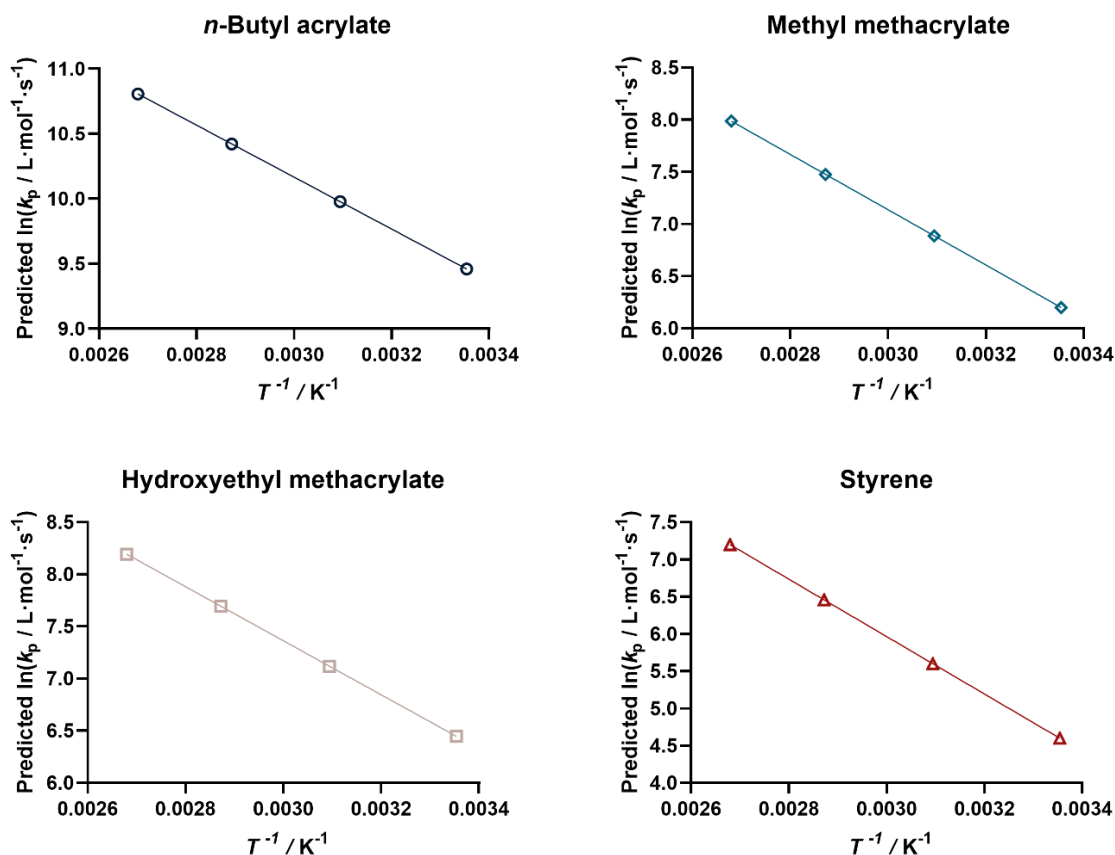

Figure 24: Arrhenius plots of *n*-Butyl acrylate, methyl methacrylate, hydroxyethyl methacrylate and styrene. The predicted  $\ln(k_p)$  values were determined by a cross validated Ridge regression on all available  $\ln(K_p)$  data with the molecular weight and a distinction between the type of monomer (blue = acrylate, teal = methacrylate, grey = H-binding monomers and red = other monomers), inductive effect of the tail group, the effect of H-donors and H-acceptors, the dissociation constants and polarizability as parameters



## References

1. Asua, J.M., et al., *Critically Evaluated Rate Coefficients for Free-Radical Polymerization*, 5. *Macromolecular Chemistry and Physics*, 2004. **205**(16): p. 2151-2160.
2. Kockler, K.B., et al., *Determining Free-Radical Propagation Rate Coefficients with High-Frequency Lasers: Current Status and Future Perspectives*. *Macromol Rapid Commun*, 2016. **37**(2): p. 123-34.
3. Kockler, K.B., et al., *No Apparent Correlation of  $k_p$  with Steric Hindrance for Branched Acrylates*. *Macromolecular Chemistry and Physics*, 2015. **216**(14): p. 1573-1582.
4. Barner-Kowollik, C., et al., *Critically evaluated rate coefficients in radical polymerization – 7. Secondary-radical propagation rate coefficients for methyl acrylate in the bulk*. *Polymer Chemistry*, 2014. **5**(1): p. 204-212.
5. Dervaux, B., et al., *Propagation rate coefficients of isobornyl acrylate, tert-butyl acrylate and 1-ethoxyethyl acrylate: A high frequency PLP-SEC study*. *Journal of Polymer Science Part A: Polymer Chemistry*, 2009. **47**(23): p. 6641-6654.
6. Barner-Kowollik, C., et al., *Detailed investigation of the propagation rate of urethane acrylates*. *Polymer Chemistry*, 2010. **1**(4): p. 470-479.
7. Beuermann, S. and M. Buback, *Rate coefficients of free-radical polymerization deduced from pulsed laser experiments*. *Progress in Polymer Science*, 2002. **27**(2): p. 191-254.
8. Haehnel, A.P., et al., *Global Trends for  $k_p$ ? Expanding the Frontier of Ester Side Chain Topography in Acrylates and Methacrylates*. *Macromolecules*, 2013. **46**(1): p. 15-28.
9. Beuermann, S., et al., *Critically evaluated rate coefficients for free-radical polymerization, 3. Propagation rate coefficients for alkyl methacrylates*. *Macromolecular Chemistry and Physics*, 2000. **201**(12): p. 1355-1364.
10. Beuermann, S., et al., *Critically Evaluated Rate Coefficients for Free-Radical Polymerization*, 4. *Macromolecular Chemistry and Physics*, 2003. **204**(10): p. 1338-1350.
11. Beuermann, S., et al., *Critically evaluated rate coefficients for free-radical polymerization, 2.. Propagation rate coefficients for methyl methacrylate*. *Macromolecular Chemistry and Physics*, 1997. **198**(5): p. 1545-1560.
12. Nitschke, A., et al., *Investigation into the Kinetics of n-Pentyl Methacrylate Radical Polymerization*. *Macromolecular Chemistry and Physics*, 2020. **221**(1): p. 1900345.
13. Junkers, T., S.P.S. Koo, and C. Barner-Kowollik, *Determination of the propagation rate coefficient of acrylonitrile*. *Polymer Chemistry*, 2010. **1**(4): p. 438-441.
14. Stach, M., et al., *Free-Radical Propagation Kinetics of N-Vinyl Formamide in Aqueous Solution Studied by PLP-SEC*. *Macromolecular Chemistry and Physics*, 2010. **211**(5): p. 580-593.
15. Stach, M., et al., *Propagation Rate Coefficient for Radical Polymerization of N-Vinyl Pyrrolidone in Aqueous Solution Obtained by PLP-SEC*. *Macromolecules*, 2008. **41**(14): p. 5174-5185.
16. Buback, M., et al., *Critically evaluated rate coefficients for free-radical polymerization, 1. Propagation rate coefficient for styrene*. *Macromolecular Chemistry and Physics*, 1995. **196**(10): p. 3267-3280.
17. Barner-Kowollik, C., et al., *Critically Evaluated Rate Coefficients in Radical Polymerization – 8. Propagation Rate Coefficients for Vinyl Acetate in Bulk*. *Macromolecular Chemistry and Physics*, 2017. **218**(1): p. 1600357.
18. Hansch, C. and T. Fujita, *p- $\sigma$ - $\pi$  Analysis. A Method for the Correlation of Biological Activity and Chemical Structure*. *Journal of the American Chemical Society*, 1964. **86**(8): p. 1616-1626.
19. Santos-Martins, D. and S. Forli, *Charting Hydrogen Bond Anisotropy*. *Journal of chemical theory and computation*, 2020. **16**(4): p. 2846-2856.
20. Brocks, J.J., et al., *Estimation of Bond Dissociation Energies and Radical Stabilization Energies by ESR Spectroscopy*. *The Journal of Organic Chemistry*, 1998. **63**(6): p. 1935-1943.

21. Hoerl, A.E. and R.W. Kennard, *Ridge Regression: Biased Estimation for Nonorthogonal Problems*. *Technometrics*, 1970. **12**(1): p. 55-67.
